1        **Developmental Stress has Sex-Specific Effects on Nestling Growth and Adult Metabolic**  
2        **Rates but no Effect on Adult Body Size or Body Composition in Song Sparrows**

3  
4  
5        **Kim L Schmidt<sup>1,2\*</sup>, Elizabeth A MacDougall-Shackleton<sup>1</sup>, Scott A MacDougall-**  
6        **Shackleton<sup>1,2,3</sup>**

7  
8  
9  
10        <sup>1</sup> Department of Biology, University of Western Ontario, London, Ontario, Canada

11        <sup>2</sup> Advanced Facility for Avian Research, University of Western Ontario, London, Ontario,  
12        Canada

13        <sup>3</sup> Department of Psychology, University of Western Ontario, London, Ontario, Canada

14  
15  
16        Short title: Effect of developmental stress on growth and metabolism

17  
18  
19  
20  
21        \* Corresponding Author:

22        Kim Schmidt

23        [kschmi5@uwo.ca](mailto:kschmi5@uwo.ca)

24        Dept. of Biology, Advanced Facility for Avian Research

25        University of Western Ontario

26        London, ON, N6A 5B8

27        Phone: 519-661-2111 ext 84646

28

## 29 **Summary**

30 Variation in the pre- and postnatal environments can have long-term effects on adult phenotype.  
31 In humans and other animals, exposure to stressors can lead to long-term changes in physiology.  
32 These changes may predispose individuals to disease, especially disorders involving energy  
33 metabolism. In addition, by permanently altering metabolic rates and energy requirements, such  
34 effects could have important fitness consequences. We determined the effects of early-life food  
35 restriction and corticosterone (CORT) treatment on growth and adult body size, body  
36 composition (assessed via quantitative magnetic resonance), and metabolic rates in a songbird,  
37 the song sparrow (*Melospiza melodia*). Nestlings were hand-raised in captivity from 3 days of  
38 age (d3). Treatments (*ad libitum* food, food restriction, or CORT-treatment) lasted from d7–d60.  
39 Both experimental treatments had sex-specific effects on growth. In the nestling period, CORT-  
40 treated males weighed more than controls, whereas CORT-treated females weighed less than  
41 controls. Food-restricted males weighed the same as controls, whereas food-restricted females  
42 weighed less than controls. Both experimental treatments also had sex-specific effects on  
43 standard metabolic rates (SMR). Females exposed to food restriction or CORT treatment during  
44 development had higher SMRs in adulthood than control females, but neither stressor affected  
45 SMR in males. There were no effects of either treatment on adult body size, body composition  
46 (lean or fat mass), or peak metabolic rates. Therefore early-life stress may have sex-specific  
47 programming effects on metabolic rates and energy expenditure in song sparrows. In addition,  
48 both treatments affected nestling growth in a manner that exaggerated the typical sex difference  
49 in nestling mass, which could provide male nestlings with a competitive advantage over their  
50 sisters when developing in a poor quality environment.

51

52 **Keywords:** aerobic capacity, basal metabolic rate, bird, body composition, glucocorticoid,  
53 metabolic scope, peak metabolic rate, plasticity, songbird, standard metabolic rate, stress

54

## 55 1. Introduction

56 Variation in the pre- and postnatal environments can lead to long-term variation in adult  
57 phenotype, a process often referred to as developmental programming (McMillen and Robinson,  
58 2005). In particular, exposure to stressors early in life, such as nutritional restriction, infection, or  
59 elevated glucocorticoid levels, can alter development leading to permanent changes in physiology  
60 (McMillen and Robinson, 2005; Rinaudo and Wang, 2011; Welberg and Seckl, 2001). In  
61 humans, these early-life events alter fetal or infant growth and may predispose individuals to  
62 disease, especially those involving energy metabolism. For example, low birth weight in humans  
63 is associated with increased risk of obesity, type II diabetes, and impaired lipid metabolism in  
64 adulthood (Barker et al., 1993; Rinaudo and Wang, 2011). Individuals exposed to famine *in*  
65 *utero* have higher indices of obesity (Ravelli et al., 1999) and impaired glucose tolerance  
66 (Ravelli et al., 1998), suggesting that nutritional restriction during development may be a  
67 particularly important risk factor for disease in later life. In support of this, rats exposed to a low  
68 protein diet *in utero* or during the early postnatal period exhibit altered postnatal growth and  
69 long-term changes in glucose metabolism and insulin resistance (Zambrano et al., 2006). In  
70 mammals, the specific physiological effects of a stressor often depend on what stage of  
71 development exposure occurred (Painter et al., 2005).

72 In addition to changes in energy metabolism, studies in birds have shown important links  
73 between variation in the early rearing environment and variation in metabolic rates. For example,  
74 zebra finches (*Taeniopygia guttata*) raised in experimentally enlarged broods had higher  
75 standard metabolic rates (SMRs) in adulthood compared to those raised in smaller broods  
76 (Verhulst et al., 2006). In the same species, treatment with the glucocorticoid hormone  
77 corticosterone (CORT) during the nestling period increased overnight variability in SMRs,  
78 however this effect was seen only during the treatment period and not in adulthood (Spencer and  
79 Verhulst, 2008). In both these studies, the effect of the stressor on metabolic rates was more  
80 severe in females than males, suggesting that early-life stressors could have sex-specific  
81 programming effects on energy expenditure. Variation in metabolic rates could in turn have  
82 important fitness consequences. For example, individuals with higher metabolic rates have  
83 higher energy requirements and may have to spend more time foraging for food or be less likely  
84 to survive food shortages. High resting metabolic rates have also been linked to decreased  
85 longevity (Manini, 2010; Speakman, 2005). In addition, basal metabolic rates (BMRs) are

86 positively correlated to reproduction, such that species with high BMRs often have higher  
87 reproductive rates (Hennemann, 1983). Therefore, at the inter-specific level, variation in  
88 metabolic rates may mediate important tradeoffs between reproduction and survival. However,  
89 whether or not variation in metabolic rates is related to reproduction and survival within a  
90 species is less clear.

91         The physiological mechanisms underlying the effects of early-life stressors on energy  
92 metabolism and metabolic rates involve many processes (Rinaudo and Wang, 2011). The stressor  
93 may directly alter the development of an organ resulting in permanent changes in organ  
94 morphology or function. For example, pre and postnatal protein restriction in rats reduces the  
95 growth of the pancreas, spleen, muscle, and liver (Desai et al., 1996). Changes in organ size  
96 could be due to reductions in cell number or cell size. In rats, early-life protein restriction  
97 decreases beta cell proliferation and the size of islets in the pancreas (Snoeck et al., 1990). A  
98 variety of stressors may also increase fetal or neonatal glucocorticoid exposure, which also affect  
99 offspring growth and development (Fernandez-Twinn and Ozanne, 2006; Welberg and Seckl,  
100 2001). Food restriction can increase baseline and stress-induced glucocorticoid levels in birds  
101 (Kempster et al., 2007; Kitaysky et al., 2001), amphibians (Crespi and Denver, 2005), and  
102 mammals (Lesage et al., 2001). In turn, early-life glucocorticoid exposure has many of the same  
103 detrimental effects as nutritional restriction, including growth retardation (Spencer et al., 2003),  
104 impaired brain development (Buchanan et al., 2004), and altered energy metabolism (Harris and  
105 Seckl, 2011; O'Regan et al., 2004). In addition, stressors during development can alter typical  
106 patterns of somatic growth, which can also be detrimental. A stressor may initially retard growth  
107 but be followed by a period of rapid growth acceleration once the stressor subsides (*catch-up*  
108 *growth*) such that there are no long-term effects on body size. Although beneficial in the short-  
109 term, catch-up growth may negatively affect health and fitness (Hales and Ozanne, 2003;  
110 Metcalfe and Monaghan, 2001). For example, catch-up growth results in long-term increases in  
111 resting metabolic rates in zebra finches (Criscuolo et al., 2008) and decreases longevity in rats  
112 (Jennings et al., 1999).

113         We examined the effects of early-life food restriction and treatment with exogenous  
114 CORT on i) nestling growth and adult ii) body size, iii) body composition, and iv) metabolic  
115 rates in song sparrows (*Melospiza melodia*). We used CORT treatment to determine whether  
116 glucocorticoids have similar effects as food restriction on growth and physiology. Since a variety

117 of stressors increase glucocorticoid levels, this allowed us to determine if a number of different  
118 stressors might affect growth and metabolism via CORT in song sparrows. We monitored  
119 nestling growth during and after the treatment period to determine if birds exhibited catch-up  
120 growth and to evaluate the long-term effects of each treatment on adult body size. We also used  
121 quantitative magnetic resonance (QMR) analysis to examine body composition, to determine if  
122 developmental stress has long-term effects on lean and fat mass. Last, we investigated the effects  
123 of food restriction and CORT treatment on metabolic rates, specifically standard metabolic rates  
124 (SMR) and peak metabolic rates (PMR). Although past studies on birds have examined the  
125 effects of variation in the early rearing environment on SMRs, no studies have examined PMR to  
126 determine if early-life stress could affect the ability of an animal to perform intense exercise.  
127 Because the ability to perform intense exercise might be necessary for birds to forage, escape  
128 predators, and complete annual migrations, changes in PMR could have important fitness  
129 consequences.

130

## 131 **2. Methods**

### 132 ***2.1 Study Subjects and Rearing Conditions***

133 Song sparrow nests were located near Newboro, Ontario, Canada (44°38'N, 76°20'W)  
134 during May and June 2010. Nests were monitored to determine the day-of-hatch. All nests  
135 hatched between May 9<sup>th</sup> – June 7<sup>th</sup> 2010 and represented the first brood for the pair that year.  
136 The territorial male associated with each nest was caught using mistnets and conspecific song  
137 playback, and had morphological measurements collected (see below) prior to nests hatching, in  
138 April and May 2010. Since extra-pair paternity is infrequent in this study population  
139 (consistently below 10% of nestlings; Potvin and MacDougall-Shackleton, 2009; EAMS  
140 unpublished data), the resident male was presumed to be the genetic father of nestlings hatching  
141 on the territory. We did not catch the female associated with each territory (the presumed  
142 mother) because we did not want to interfere with egg laying or incubation, which may increase  
143 the chance of nest predation or desertion. A total of 47 nestlings from 15 broods were used for  
144 this study. Of these, 43 were brought into captivity at 3-4 days post-hatch (d3-d4), and 4 were  
145 brought in at ~d7 (mean=3.44 days, SEM=0.16; Table 1).

146 Nestlings were kept warm using heat lamps and electric heating pads until they  
147 developed feathers (~d7), and were transported to The University of Western Ontario, London,

148 Ontario, Canada and housed at the Advanced Facility for Avian Research for the remainder of  
149 the experiment. Nestlings were housed in a cage with their siblings until they began eating  
150 independently (~d25), at which point they were housed individually. Birds were kept on a long  
151 day photoperiod (16L:8D) until August 16th, 2010, then switched to short days (10L:14D) for  
152 the remainder of the experiment. Sex of nestlings was determined using polymerase chain  
153 reaction (PCR) amplification of genes on the sex chromosomes (Griffiths et al., 1998).  
154 Amplification and electrophoresis conditions are described elsewhere (Potvin and MacDougall-  
155 Shackleton, 2010).

## 156 **2.2 Experimental Treatments**

157 Within each brood, nestlings were assigned to one of the three treatment groups (control,  
158 food restriction, or CORT treatment). This was done using block randomization, such that if  
159 there were three or more nestlings in a brood at least one nestling was assigned to each treatment.  
160 This method of randomization was used instead of true randomization to ensure that we had  
161 similar sample sizes for each treatment group. In addition, this procedure allowed us to ensure  
162 that there were never more than two nestlings from a given brood in a treatment and therefore to  
163 control for nest of origin as best as possible. In total, there were 16 control subjects (9 males, 7  
164 females), 16 food-restricted subjects (8 males, 8 females) and 15 CORT-treated subjects (6  
165 males, 9 females; Table 1). Food restriction and CORT treatment lasted from d7-d60 (see Fig 1  
166 for timeline).

167 All nestlings received a standard hand-rearing diet administered via 1mL syringes. The  
168 diet consisted of ground Mazuri Small Bird Maintenance diet (56A6), hard-boiled chicken eggs  
169 (shells removed), wheat germ, water, and Prime avian vitamin supplement (Rolf C. Hagen Inc,  
170 Montreal, QC). We followed a food restriction protocol that has been used for a variety of  
171 songbird species (Nowicki et al., 2002; MacDonald et al., 2006). Briefly, for each brood, the  
172 control and CORT-treated birds were first fed *ad libitum*. We calculated the average amount of  
173 food eaten by nestlings in these two groups and then fed 65% of this amount to the food-  
174 restricted siblings. Nestlings were fed every 30 min during daylight hours until d18. At this time,  
175 we added food dishes to the cages and slowly lengthened the feeding interval to encourage birds  
176 to eat independently. Once feeding independently, birds were fed a 50:50 mix of ground Mazuri  
177 Small Bird Maintenance Diet (catalogue number 56A6) and premium budgie seed (Rolf C.  
178 Hagen Inc, Montreal, QC). In order to continue the food restriction stressor into the fledgling

179 period, we removed food cups for 3 h per day until d60 for this treatment group. The start of this  
180 3 h period was randomized each day. This protocol has been used in European starlings and  
181 affects adult body size, immune function, song production, and spatial learning (Buchanan et al.,  
182 2003; Farrell et al., 2011).

183 For CORT treatment, CORT was dissolved in peanut oil and orally administered to birds.  
184 This non-invasive technique results in a transient increase in CORT similar to that experienced in  
185 response to an acute stressor and in nestling zebra finches affects nestling growth, brain  
186 development, and song learning (Buchanan et al., 2004; Spencer et al., 2003). We used a dose of  
187 0.87  $\mu\text{g/g}$  body weight, which was determined during pilot studies (see below). CORT was fed to  
188 nestlings twice per day, once in the morning and once in the evening. Control and food-restricted  
189 birds were fed peanut oil alone. Once birds were eating independently, CORT was first injected  
190 into wax worm larvae and then fed to birds once per day in the morning until d60 (Breuner et al.,  
191 1998). Control and food-restricted birds were fed wax worm larvae injected with oil only.

192 We conducted a pilot study to verify that orally administering CORT resulted in a  
193 transient increase in CORT similar to that observed in song sparrows in response to restraint  
194 stress (MacDougall-Shackleton et al., 2009; Newman et al., 2008). We injected CORT into wax  
195 worm larvae (dose = 1  $\mu\text{g/g}$  body weight) and fed the worms to captive song sparrows. Blood  
196 samples were collected 0, 10, or 30 min post-ingestion of the worm. CORT levels were low 0  
197 min post-ingestion ( $n=4$ ,  $4.16 \pm 2.38$ ), peaked 10 min post-ingestion ( $n=3$ ,  $173.13 \pm 51.40$   
198  $\text{ng/mL}$ ) and had begun to decrease after 30 min ( $n=4$ ,  $61.58 \pm 9.35$   $\text{ng/mL}$ ). Because peak CORT  
199 levels were slightly higher than CORT levels post-restraint in our population (MacDougall-  
200 Shackleton et al., 2009; Schmidt et al., 2012), we used a slightly lower dose of 0.87  $\mu\text{g/g}$  body  
201 weight for our experiment. In studies using a similar manipulation in white-crowned sparrows,  
202 CORT levels peaked 7 min post-ingestion of the worm, were still elevated 30 min post-ingestion,  
203 and had returned to baseline after 60 min (Breuner et al., 1998). Therefore, this method of  
204 administration results in a transient increase in CORT that is very similar to the increase  
205 observed after exposure to an acute stressor.

206 To verify that the CORT treatment was effective during the experiment, we collected  
207 blood samples ( $\sim 30$   $\mu\text{L}$ ) on d10 and d45, 10 min after administration of CORT or vehicle to  
208 determine plasma CORT levels. CORT was quantified in unextracted plasma using a  
209 radioimmunoassay (MP Biomedicals, 07-120103) that has been previously validated in song



210 sparrows (Newman et al., 2008). Three separate assays were conducted and samples from all  
211 subjects were randomly assigned to an assay such that each treatment was equally represented in  
212 each assay. The lower limit of detectability ranged from 1.8 – 2.6 ng/mL. Inter-assay variation  
213 was 5.5% for a low control and 4.1% for a high control. Intra-assay variation was 9.4% for the  
214 low control and 3.9% for the high control.

### 215 **2.3 Body Measurements**

216 Body mass was measured using a spring scale to the nearest 0.1 g. We measured nestling  
217 body mass daily as soon as the lights came on (5:30 AM) until d25. Thereafter, we measured  
218 body mass every 5 days until d60. Adult body mass (~ 7 months) was measured the evening  
219 prior to and the morning following SMR measurements and prior to PMR measurements. To  
220 compare adult masses across treatments, we used masses recorded the morning after SMR  
221 measurements when birds were in the post-absorptive state. We also measured the length of the  
222 wing chord and tarsus to the nearest 0.1 mm using dial calipers on d25, d45, and during  
223 adulthood prior to SMR measurements.

### 224 **2.4 Body Composition Analysis**

225 We determined lean and fat mass using quantitative magnetic resonance (QMR) analysis  
226 (Guglielmo et al., 2011) the morning following SMR determination when birds were still in the  
227 post-absorptive state. The QMR unit (Echo-MRI-B, Echo Medical Systems, Houston, Texas)  
228 was custom-designed for use with small birds and bats. The QMR was calibrated daily using 5 g  
229 and 94 g canola oil standards. To use the QMR, awake birds were placed into plastic holding  
230 tubes and inserted into the QMR analyzer and scanned using the “small bird” and “two  
231 accumulation” settings of the Echo MRI software. Fat and lean mass measurements were  
232 reported to the nearest 0.001 g. Fat and lean mass measurements were slightly adjusted to  
233 improve accuracy using calibration equations developed from house sparrows and zebra finches  
234 (fat mass: raw value x 0.94; lean mass: raw value x 1.021, Gerson and Guglielmo, 2011;  
235 Guglielmo et al., 2011). Validation studies conducted previously show that the coefficients of  
236 variation for fat and lean mass are 3% and 0.5%, respectively and relative accuracies are  $\pm 11\%$   
237 and  $\pm 1\%$ , respectively (Guglielmo et al., 2011).

### 238 **2.5 Respirometry**

#### 239 *Standard Metabolic Rates*



240 Metabolic rates were measured using open-circuit respirometry. We measured the SMR  
241 of birds between December 2010 and January 2011 when birds were ~7 months old (mean=214  
242 days, SEM=0.88), which was about 5 months after the end of the stress treatments. Beginning at  
243 20:00 h, body measurements were taken and birds were placed into one of 5 stainless-steel  
244 chambers. Chambers were placed in a temperature-controlled cabinet at 30°C, which is within  
245 the thermoneutral zone for other species of songbirds that are similar in size to song sparrows  
246 (Root et al., 1991). Four birds were individually placed into the chambers every night and the  
247 remaining chamber was used for baseline measurements. Birds fasted in the chambers for 3 h  
248 and then O<sub>2</sub> consumption was measured in the remaining 9 h of the overnight period. Thus  
249 measurements were taken during the inactive period, in the post-absorptive state, and while birds  
250 were housed on short-days and thus in non-breeding condition. However, the exact temperature  
251 range of the thermoneutral zone for song sparrows is unknown so we refer to our measurements  
252 as standard metabolic rates (SMRs) instead of basal metabolic rates (BMRs). Incurrent air was  
253 scrubbed of CO<sub>2</sub> and water vapor using soda lime and Drierite, respectively. The five sealed  
254 chambers received a constant flow of 450 mL/min. Excurrent air was sub-sampled at 150  
255 mL/min and passed through a Drierite column to the CO<sub>2</sub> analyzer (catalogue number: CA-2A;  
256 Sable Systems Las Vegas, NV) and the O<sub>2</sub> analyzer (Sable Systems FC-1B), with CO<sub>2</sub> and water  
257 scrubbing between the two gas analyzers. Gas analyzers were calibrated daily using a standard  
258 containing 20.9% O<sub>2</sub> and 2% CO<sub>2</sub> balanced with N<sub>2</sub> (Praxair, London, ON). Using a multiplexer  
259 (Sable Systems), one chamber was measured at a time for 10 minutes before switching to the  
260 next chamber. In total, each bird was measured 12 times throughout the night for 10 minutes at a  
261 time. All instruments were connected to an analog-to-digital converter (UI-2 model, Sable  
262 Systems), which was connected to a laptop computer. Data analysis was done using Warthog  
263 Systems Lab Analyst software (M.A. Chappel, University of California Riverside). SMR values  
264 reported were calculated as the minimum 10 min mean of O<sub>2</sub> consumption throughout the  
265 measurement period. We calculated VO<sub>2</sub> (based on calculations in Lighton, 2008; p 112,  
266 equation 10.6) and converted VO<sub>2</sub> to watts (W). The equation that we used to calculate VO<sub>2</sub> used  
267 the data for both O<sub>2</sub> consumption and CO<sub>2</sub> production (Lighton, 2008). The following morning,  
268 birds were weighed, analyzed for body composition using QMR, and returned to their home  
269 cage.

270 *Peak Metabolic Rates*

271 The same flow system used to determine SMRs was used to determine the PMR of each  
272 bird. After measuring SMR, birds were left undisturbed in their home cage for one full day. We  
273 measured PMR the afternoon of the following day (39-42 h after the start of SMR measurement).  
274 PMR was measured using an enclosed running wheel modified for use with flying birds (Pierce  
275 et al., 2005; Price and Guglielmo, 2009). The wheel (width=16 cm; diameter=24 cm) was made  
276 of acrylic plastic and was lined with rubber. Three ping-pong balls were placed in the wheel to  
277 prevent birds from walking. Air flowed into the wheel at a rate of 4000 mL/min and was sub-  
278 sampled as described above for measurements of SMR. Food dishes were removed 3 h before  
279 testing to insure birds were in the post-absorptive state. Beginning at 11:00, and no later than  
280 14:00, birds were weighed and placed into the flight wheel. The flight wheel was covered and  
281 birds were allowed to acclimate for 10 min. The wheel was then spun manually to initiate  
282 exercise. The wheel was kept in constant motion so that birds were forced to hop and hover until  
283 PMR was reached (always occurred within 15 min). This method provides a significant aerobic  
284 challenge and has been used to estimate PMR in several previous studies of flying birds (Pierce  
285 et al., 2005; Price and Guglielmo, 2009). In all cases, after PMR was reached O<sub>2</sub> consumption  
286 decreased and then stabilized. The PMR of an individual was calculated as the maximum mean  
287 of O<sub>2</sub> consumption over a 1 min period. Data are expressed as watts and we calculated the  
288 metabolic scope of each individual (PMR/SMR), which provides an estimate of intensity of  
289 exercise (Pierce et al., 2005).

290 **2.7 Data Analysis**

291 Statistical analyses were conducted using SPSS version 19. For CORT levels, we  
292 conducted linear mixed models using restricted maximum likelihood (REML) models. Subject  
293 identity was added as a random factor with unstructured covariance. Age, treatment, and sex  
294 were included as fixed effects. Significant main effects of treatment were analyzed using least  
295 significant difference (LSD) pairwise comparisons.

296 We also used linear mixed models to analyze nestling growth data. We conducted two  
297 separate analyses to reflect the two different parts of the treatment period. The first analysis  
298 involved the mass of nestlings from d9-d18, that is, throughout the hand-rearing period. We  
299 expected the treatments to most strongly affect growth during this period since this is when the  
300 food restriction stressor was most severe and was also when CORT-treated birds were fed CORT

301 twice per day instead of once. The second analysis involved the mass of nestlings from d19-d60,  
302 the period in which birds began feeding independently up to the end of the treatment period. For  
303 both analyses, age was added as a repeated factor with first-order autoregressive covariance  
304 structure (West, 2009). Sex, treatment, and age were added as fixed effects. Significant sex x  
305 treatment interactions were further analyzed by conducting linear mixed models for each sex  
306 with treatment and age as fixed factors. Significant main effects of treatment were analyzed  
307 using LSD pairwise comparisons. Paternal body mass and hatch date were included as covariates  
308 and nest identity (the natal brood nestlings came from) was included as a random factor. For nest  
309 identity, each nest was assigned a nominal value so that all siblings shared the same value but  
310 had a different value than individuals from other nests. This variable was coded as a nominal  
311 variable and was selected as a random factor in all analyses. The mass of nestlings the day they  
312 were brought into captivity, and thus before the treatments begun, was also included as a  
313 covariate in order to control for chance variation in mass or condition. One initial model was  
314 conducted for each age period (d9-d18 and d19-d60) that included the fixed factors (treatment,  
315 sex, age), the random factor (nest identity) and the covariates (hatch date, paternal mass, initial  
316 nestling mass). If the covariates or random factor were not significant they were removed from  
317 the analysis in order to create the simplest model possible.

318 To compare the effects of the treatments on body size, we analyzed mass, tarsus, and  
319 wing length using a principal component analysis (PCA) at each age (d25, d45, adulthood), since  
320 these three measures were highly correlated. Data were log transformed before being entered into  
321 the PCA. At all three ages, the PCA revealed one component with an eigenvalue greater than 1  
322 (Table 2). We interpreted this component as representing overall body size. The resulting PC  
323 scores were then analyzed using two-way ANOVAs with treatment and sex as between subjects  
324 factors. Significant main effects of treatment were compared using LSD pairwise comparisons.  
325 Hatch date was included as a covariate and nest identity was included as a random factor. At  
326 each age, the initial model included the fixed factors (treatment and sex), the random factor (nest  
327 identity) and the covariate (hatch date). If the covariate or random factor were not significant  
328 they were removed from the analysis.

329 Body composition (fat, lean mass, adult mass) and metabolic rates (SMR, PMR,  
330 metabolic scope), were analyzed using two-way ANOVAs with sex and treatment as between  
331 subjects factors. Significant sex x treatment interactions were further analyzed by conducting

332 ANOVAs for each sex with treatment as a fixed factor. Significant main effects of treatment  
333 were analyzed using LSD pairwise comparisons. Hatch date was added as a covariate and nest  
334 identity as a random factor for analyses of both metabolic rates and body composition, and body  
335 mass was included as a covariate for analyses of metabolic rates. The initial models included the  
336 fixed factors (treatment and sex), the random factor (nest identity) and the covariates (hatch date,  
337 body mass). If the covariates or random factor were not significant they were removed from the  
338 analysis.

339 Finally, total adult body mass and lean body mass of the hand-raised birds was directly  
340 compared to the mass of their fathers using simple linear regressions. All tests were two-tailed  
341 and were considered significant for  $p \leq 0.05$ . Data are presented as mean  $\pm$ SEM, adjusted for  
342 significant covariates where applicable.

343

### 344 **3. Results**

#### 345 **3.1. CORT levels**

346 The exogenous CORT treatment was effective in significantly elevating plasma CORT  
347 levels (main effect of treatment:  $F_{2,41.77}=84.79$ ,  $p<0.001$ ). CORT levels 10 min post-  
348 administration of CORT or vehicle were higher in CORT-treated birds (d10= $136.64 \pm 15.64$ ; d45  
349 =  $143.35 \pm 14.48$ ) than controls (d10= $6.76 \pm 1.70$ ; d45= $18.88 \pm 3.69$ ;  $p<0.001$ ) or food-restricted  
350 birds (d10= $4.19 \pm 0.62$ ; d45= $28.24 \pm 4.45$ ;  $p<0.001$ ). Control and food-restricted birds did not  
351 differ significantly in plasma CORT levels ( $p=0.71$ ). Therefore, our method of oral CORT  
352 administration was effective at increasing circulating CORT, and levels reached those typically  
353 observed in wild song sparrows subjected to an acute stressor (MacDougall-Shackleton et al.,  
354 2009; Schmidt et al., 2012). We also detected a significant main effect of age ( $F_{1,42.11}=7.51$ ,  
355  $p=0.01$ ), as CORT levels were higher at d45 than d10. No significant main effect of sex was  
356 detected ( $F_{1,41.79}=1.06$ ,  $p=0.31$ ), nor were any of the interaction terms significant ( $p>0.40$  in all  
357 cases).

#### 358 **3.2 Nestling Growth**

359 To compare mass between nestlings at the start of the treatment period (d7), we  
360 conducted an ANOVA with treatment and sex as fixed factors. The main effect of treatment was  
361 not significant at d7 ( $F_{2,47}=0.60$ ,  $p=0.56$ ). Neither the main effect of sex ( $F_{1,47}=2.86$ ,  $p=0.10$ ) nor  
362 the treatment x sex interaction ( $F_{2,47}=1.67$ ,  $p=0.20$ ) were significant.

363 For the hand-rearing period (d9-d18), the treatment x sex ( $F_{2,40.07}=6.24$ ,  $p=0.004$ ) and the  
364 age x sex ( $F_{9,182.601}=2.12$ ,  $p=0.03$ ) interactions were significant (Fig 2A and 2B). Neither the  
365 treatment x sex x age nor the treatment x age interactions were significant ( $p>0.66$  in both cases).  
366 The mass of nestlings prior to the treatment period was positively related to mass during the  
367 hand-rearing period ( $F_{1,39.94}=7.19$ ,  $p=0.01$ , estimate of fixed effect=0.16, S.E.=0.06). To explore  
368 the treatment x sex interaction, we conducted linear mixed models for each sex with treatment  
369 and age as fixed factors. For males, the main effect of treatment was significant ( $F_{2,19.02}=3.98$ ,  
370  $p=0.04$ ; Fig 2A). CORT-treated males weighed more than control ( $p=0.03$ ) and food-restricted  
371 ( $p=0.02$ ) males. Control and food-restricted males did not differ ( $p=0.80$ ). The mass of males  
372 prior to the treatment period was positively related to mass during the hand-rearing period  
373 ( $F_{1,18.98}=4.24$ ,  $p=0.05$ , estimate of fixed effect=0.25, S.E.=0.12). For females, similar to males,  
374 the main effect of treatment was significant ( $F_{2,20.08}=4.58$ ,  $p=0.02$ ; Fig 2B). However, control  
375 females weighed more than both food-restricted ( $p=0.01$ ) and CORT-treated ( $p=0.02$ ) females.  
376 Food-restricted and CORT-treated females did not differ ( $p=0.81$ ). The mass of females prior to  
377 the treatment period was positively related to mass during the hand-rearing period ( $F_{1,19.94}=4.24$ ,  
378  $p=0.05$ , estimate of fixed effect=0.11, S.E.=0.05).

379 The second analysis examined the latter part of the treatment period (d19-d60), after food  
380 cups had been added to cages and birds began to feed independently. During this period, neither  
381 the treatment x age x sex interaction, nor any of the two-way interactions were significant  
382 ( $p>0.10$  in all cases). There was a significant main effect of sex ( $F_{1,37.75}=47.31$ ,  $p<0.001$ ); males  
383 were larger than females (Fig 2A and 2B). The main effect of age was also significant  
384 ( $F_{13,266.257}=4.87$ ,  $p<0.001$ ). The main effect of treatment was not significant ( $F_{2,37.78}=0.86$ ,  
385  $p=0.43$ ). The mass of nestlings prior to the treatment period was positively related to the mass of  
386 nestlings during the latter part of the treatment period ( $F_{1,35.94}=4.55$ ,  $p=0.04$ , estimate of fixed  
387 effect=0.10, S.E.=0.05). Hatch date was also positively related to mass during this period  
388 ( $F_{1,35.92}=4.67$ ,  $p=0.04$ , estimate of fixed effect=0.05, S.E.=0.02). Finally, paternal body mass was  
389 also a significant covariate ( $F_{1,35.92}=4.04$ ,  $p=0.05$ , estimate of fixed effect=0.26, S.E.=0.13);  
390 heavier fathers had heavier offspring.

### 391 **3.3 Body Size**

392 On d25, after 18 days of experimental manipulation, the main effect of treatment on body  
393 size (PC scores) was not significant ( $F_{2,47}=1.23$ ,  $p=0.30$ ), nor was there a significant treatment x

394 sex interaction ( $F_{2,47}=0.22$ ,  $p=0.80$ ). However, the main effect of sex was significant  
395 ( $F_{1,47}=31.93$ ,  $p<0.001$ ); males were larger than females (Fig 3A). On d45, after about 5 weeks of  
396 manipulation, the main effect of treatment on body size was significant ( $F_{2,45}=3.53$ ,  $p=0.04$ ).  
397 CORT-treated birds were smaller than control ( $p=0.02$ ) and food-restricted birds ( $p=0.002$ ).  
398 Control and food-restricted birds did not differ ( $p=0.37$ ). Again, we observed a main effect of sex  
399 ( $F_{2,45}=21.64$ ,  $p<0.001$ ) such that males were larger than females (Fig 3B), but no treatment x sex  
400 interaction ( $F_{2,45}=0.82$ ,  $p=0.45$ ). Last, in adulthood neither the main effect of treatment  
401 ( $F_{2,27}=0.81$ ,  $p=0.46$ ) nor sex ( $F_{1,27}=3.16$ ,  $p=0.09$ ; Fig 3C) were significant. We observed no  
402 significant treatment x sex interaction ( $F_{2,27}=0.37$ ,  $p=0.69$ ). Nest identity was significantly  
403 related to adult body size ( $F_{14,27}=3.16$ ,  $p=0.005$ ). Thus, the effects of our treatments on body size  
404 were limited to a period following rapid growth (d45) and were no longer apparent by adulthood.

### 405 **3.4 Relationship to Paternal Mass**

406 Despite the fact that the experimental treatments altered nestling growth, we observed no  
407 long-term effects on adult body size, suggesting that variation in final adult body size may  
408 primarily be due to heritable factors in song sparrows. To explore this possibility, we asked if the  
409 adult mass of study subjects was related to the mass of their fathers. Paternal body mass was  
410 positively and significantly related to offspring body mass ( $r^2=0.11$ ,  $p=0.03$ ; Fig 4A) and lean  
411 mass ( $r^2=0.23$ ,  $p<0.001$ ; Fig 4B).

### 412 **3.5 Body Composition**

413 For adult total body mass (Fig 5A), neither the main effect of treatment ( $F_{2,27}=1.45$ ,  
414  $p=0.25$ ) nor sex ( $F_{1,27}=0.70$ ,  $p=0.41$ ) was significant, nor was the treatment x sex interaction  
415 significant ( $F_{2,27}=0.78$ ,  $p=0.47$ ). Nest identity was significantly related to adult total body mass  
416 ( $F_{14,27}=3.51$ ,  $p=0.003$ ). For adult lean body mass (Fig 5B), there was no significant main effect of  
417 treatment ( $F_{2,27}=1.50$ ,  $p=0.24$ ). However, the main effect of sex was significant ( $F_{1,27}=5.36$ ,  
418  $p=0.03$ ); males had a higher lean mass than females (Fig 5B). The treatment x sex interaction  
419 was not significant ( $F_{2,27}=1.23$ ,  $p=0.31$ ). Nest identity was significantly related to adult lean mass  
420 ( $F_{14,27}=2.11$ ,  $p=0.05$ ). For adult fat mass (Fig 5C), the main effect of treatment was not  
421 significant ( $F_{2,27}=1.20$ ,  $p=0.32$ ). The main effect of sex was significant ( $F_{1,27}=5.73$ ,  $p=0.02$ );  
422 females had a higher fat mass than males (Fig 5C). The treatment x sex interaction was not  
423 significant ( $F_{2,27}=1.06$ ,  $p=0.36$ ). Again, nest identity was significantly related to adult fat mass  
424 ( $F_{14,27}=3.87$ ,  $p=0.001$ ).



### 425 **3.6 Metabolic Rates**

426 For SMR (Fig 6A), body mass was a significant covariate ( $F_{1,26}=26.13$ ,  $p<0.001$ ) and nest  
427 identity was a significant random factor ( $F_{14,26}=2.19$ ,  $p=0.02$ ). The treatment x sex interaction  
428 was significant ( $F_{2,26}=4.36$ ,  $p=0.02$ ). To further analyze this interaction, we conducted ANOVAs  
429 for each sex with treatment as a fixed factor. For males, the main effect of treatment was not  
430 significant ( $F_{2,8}=0.72$ ,  $p=0.52$ ). For females, the main effect of treatment was significant  
431 ( $F_{2,8}=5.81$ ,  $p=0.03$ ). Control females had lower SMRs than food-restricted ( $p=0.009$ ) and CORT-  
432 treated ( $p=0.04$ ) females. The SMRs of food-restricted and CORT-treated females did not differ  
433 ( $p=0.34$ ). For PMRs (Fig 6B), the main effects of neither treatment ( $F_{2,26}=0.92$ ,  $p=0.41$ ), nor sex  
434 ( $F_{1,26}=0.35$ ,  $p=0.56$ ) were significant. The treatment x sex interaction was also not significant  
435 ( $F_{2,26}=0.14$ ,  $p=0.87$ ). Nest identity was significantly related to PMR ( $F_{14,27}=2.11$ ,  $p=0.05$ ). For  
436 metabolic scope (Fig 6C), neither the main effect of treatment ( $F_{2,47}=0.88$ ,  $p=0.42$ ), nor sex  
437 ( $F_{1,47}=1.26$ ,  $p=0.27$ ) were significant. The treatment x sex interaction was also not significant  
438 ( $F_{2,47}=0.05$ ,  $p=0.96$ ).

439

## 440 **4. Discussion**

### 441 **4.1 Food Restriction Affected Growth and Metabolic Rates without Increasing CORT**

442 CORT levels did not differ between food-restricted and control subjects in our study.  
443 Therefore, food restriction might affect growth and metabolic rates independently of CORT, for  
444 example by directly altering organ morphology or cell number (Rinaudo and Wang, 2011).  
445 However, we cannot rule out the possibility that food restriction affects development by altering  
446 stress physiology. First, we only measured CORT levels at two ages (d10 and d45). It is possible  
447 that food restriction affected CORT levels during a time in the treatment period when blood  
448 samples were not collected. Second, we only measured baseline plasma CORT levels. In  
449 European starlings (*Sturnus vulgaris*), exposure to an unpredictable food supply increased stress-  
450 induced CORT levels but not baseline (Buchanan et al., 2003). Last, there are many other factors  
451 that can influence the exposure of tissues to CORT, such as the level of corticosteroid binding  
452 globulins in the blood and the expression of corticosteroid receptors or enzymes that metabolize  
453 CORT in tissues (Schmidt et al., 2008).

454 CORT levels were manipulated for a relatively long period of time in our study (53 days).  
455 However, whereas other methods of hormone manipulation (e.g. silastic implants) constantly



456 elevate hormone levels throughout the treatment period, our method of daily manipulation was  
457 transient and CORT levels began to decrease 30 min post-administration (determined during  
458 pilot study, see Methods Section 2.2). In addition, in white-crowned sparrows CORT levels  
459 returned to baseline 60 min post-administration using a similar technique (Breuner et al., 2008).  
460 Therefore, total exposure to elevated CORT was limited to about 2 h per day in the hand-rearing  
461 period and about 1 h per day in the latter part of the treatment period. Our method of  
462 manipulation would thus be comparable to an individual living in an environment where they are  
463 frequently exposed to acute stressors, such as temporary food shortages or frequent encounters  
464 with predators. Frequent exposure to acute stressors may become chronically stressful to an  
465 individual over time (Clinchy et al., 2004). Indeed, a common paradigm for experiments looking  
466 at the physiological effects of chronic stress is to expose individuals to daily acute stressors over  
467 several days (e.g. Rich and Romero, 2004).

#### 468 ***4.2 Developmental Stress had Sex-Specific Effects on Nestling Growth***

469 There were profound sex differences in the effects of developmental stress on nestling  
470 growth rates. First, CORT-treated males weighed more than food-restricted and control males  
471 throughout the hand-rearing period. This finding is surprising because most studies have found  
472 that exposure to elevated glucocorticoid levels during development retards growth (Seckl, 1994;  
473 Spencer et al., 2003), although differences in the dose of CORT or method of administration  
474 might explain some of the variation between studies. This weight advantage disappeared shortly  
475 after nestlings began feeding independently. Because CORT administration can increase begging  
476 rates in nestling birds (Kitaysky et al., 2001b) and we fed both control and CORT-treated birds to  
477 satiation, CORT-treated males may have begged more and been fed more throughout the hand-  
478 rearing stage of the experiment. Alternatively, instead of altering behavior and food intake,  
479 CORT may have increased anabolic processes. For example, in European starlings (*Sturnus*  
480 *vulgaris*), CORT treatment *in ovo* accelerates pectoral muscle development leading to enhanced  
481 flight performance (Chin et al., 2009). Glucocorticoids can also increase fat deposition (Asensio  
482 et al., 2004). If CORT accelerates growth in male nestlings and increases flight performance, it  
483 might decrease the age at which nestlings can fledge. Consistent with this, CORT increases  
484 locomotor activity (Breuner et al., 1998) and CORT levels increase prior to fledging or dispersal  
485 in many species (e.g. Belthoff and Duffy, 1998; Kern et al., 2001). If nestlings are raised in a  
486 poor quality environment, premature fledging may be beneficial since it would allow a young

487 bird to escape a stressful nest environment, for example if there was intense sibling competition  
488 in the nest or an abundance of ectoparasites. Similarly, environmental stressors, including food  
489 restriction and pond desiccation, accelerate metamorphosis in spadefoot toads (*Scaphiopus*  
490 *hammondi*; Denver et al., 1998). In contrast to males, CORT-treated females weighed less than  
491 controls throughout the hand-rearing period. Similarly, early-life glucocorticoid exposure retards  
492 growth in zebra finches (Spencer et al., 2003; Spencer and Verhulst, 2007) and humans (Seckl,  
493 1994). Thus, it appears that the effects of glucocorticoids on growth rates are sex- and age-  
494 dependent.

495         Second, there were also sex differences in the effect of food restriction on nestling  
496 growth. Food-restricted males weighed the same as control males, however food-restricted  
497 females weighed less than control females. This is in contrast to past studies in song sparrows  
498 (Kempster et al., 2007) and zebra finches (Spencer et al., 2003) in which food restriction  
499 decreased growth in both sexes. However, our results are consistent with a study of zebra finches  
500 that also found that food restriction decreased growth in females but not males (Martins, 2004).  
501 Thus, there may be sex differences in the amount of resources males and females allocate to  
502 body growth when exposed to early-life stressors. Males may allocate more resources to body  
503 growth at the expense of other systems (e.g. brain, immune system) in order to ensure survival to  
504 the fledgling stage. We are currently conducting studies to look at the effects of food restriction  
505 and CORT treatment on other physiological systems, which will hopefully shed light on the  
506 different trade-offs and strategies used by males and females when developing in a poor quality  
507 environment. Last, since larger nestlings may be fed more by parents and be more likely to  
508 fledge (Price and Ydenberg, 1995), the sex-specific effects of food restriction and CORT  
509 treatment on nestling growth could provide males with a competitive advantage over their female  
510 siblings when raised in a stressful environment (Zanette et al., 2005).

#### 511 ***4.3 Body Size in Song Sparrows may be a Canalized Trait***

512         There were no effects of food restriction or CORT treatment on body size at d25, but by  
513 d45 CORT-treated birds were smaller than food-restricted and control birds. This was true for  
514 both females and males, despite the weight advantage that CORT-treated males exhibited during  
515 the hand-rearing period. Our PCA for body size included three morphological measures (mass,  
516 wing, tarsus). Therefore, we interpret these PCA scores as measures of overall body size, but all  
517 three measures might not have been equally affected. CORT-treated birds may be structurally

518 smaller because glucocorticoids can decrease bone formation (Delany et al., 1994). In addition,  
519 wing length is related to feather development, and CORT administration impairs feather growth  
520 in European starlings (Romero et al., 2005). Despite the effect on body size during the treatment  
521 period, there were no effects of either treatment on adult body size. Since our treatments lasted  
522 until d60 this suggests that a young song sparrow may compensate for a bad rearing environment  
523 by accelerating growth once a stressor subsides even very late during development, well after  
524 full adult body size is normally attained. Adult body size may be a canalized trait in song  
525 sparrows, showing a large amount of stability even in the face of early-life perturbations  
526 (referred to as developmental homeostasis; Mitton and Grant, 1984). Therefore, variation in adult  
527 body size in song sparrows may be largely determined by variation in genotype with less  
528 influence from environmental factors. In support of this, both adult body mass and lean mass of  
529 the experimental birds were significantly related to their father's body mass, and nest identity  
530 (natal brood of origin) was significantly related to adult body size. Since we hand-reared  
531 nestlings from d3, the relationship between their mass and their father's mass would be largely  
532 due to a common genotype and not a common environment, although we cannot rule out the  
533 possibility that the environment before d3 had strong carryover effects on offspring body size.  
534 This is in contrast to past studies that have found long-term effects of early-life stress on adult  
535 body size (Searcy et al., 2004). However, our results are consistent with findings from a wild  
536 population of song sparrows where morphological measurements of offspring were strongly  
537 related to their genetic parents, but not their foster parents (Smith and Dhondt, 1980; also see  
538 review by Merila and Sheldon, 2001).

#### 539 ***4.4 Developmental Stress did not Alter Body Composition***

540 There were no long-term effects of food restriction or CORT treatment on body  
541 composition (total body mass, lean mass or fat mass), despite the fact that both treatments altered  
542 nestling growth. In contrast, in humans prenatal exposure to famine increases the risk of obesity  
543 (Ravelli et al., 1999) and a low birth rate is positively associated with obesity (Rinaudo and  
544 Wang, 2011). Catch-up growth may be a particularly important risk factor. For example, rat pups  
545 exposed to protein restriction *in utero*, but then transferred to a high quality diet during the post-  
546 partum period, exhibit rapid catch-up growth resulting in a larger body mass and a higher  
547 percentage of body fat (Desai et al., 2005). In our study, both food-restricted and CORT-treated  
548 females exhibited growth retardation during the hand-rearing period, followed by a period of

549 rapid growth during the latter stage of the treatment period. However, despite experiencing this  
550 period of rapid growth, we observed no effect on final body composition. We did observe sex  
551 differences in body composition. Males and females had similar total body mass in adulthood,  
552 but males had higher lean mass, while females had higher fat mass.

#### 553 ***4.5 Developmental Stress had Sex-Specific Effects on Metabolic Rates***

554 The SMRs of birds in the current study were similar to those obtained for house sparrows  
555 (*Passer domesticus*; Buchanan et al., 2001), which are similar in size to song sparrows. The  
556 average PMR of flying birds is 16 times higher than the BMR (Hinds et al., 1993). Past studies in  
557 both red-eyed vireos (*Vireo olivaceus*; Pierce et al., 2005) and house sparrows (Chappell et al.,  
558 1999) using similar exercise wheels have obtained PMR values that were ~10 times higher than  
559 BMR. In the current study, PMR values were only ~6 times higher than SMR values. However,  
560 the former studies used wild-caught birds, not hand-reared birds, and prolonged periods of  
561 captivity can decrease aerobic capacity in birds (Buttemer et al., 2008). Alternatively, the fact  
562 that we may have measured SMR and not true BMR could also explain why metabolic scope was  
563 lower in the present study.

564 Both food-restricted and CORT-treated females had higher SMRs than control females.  
565 However, SMRs did not differ between males in the three treatment groups. This suggests that  
566 developmental stress has sex-specific effects on metabolic rates in song sparrows. Similarly, past  
567 studies in birds have found that variation in the rearing environment more strongly affects the  
568 metabolic rates of females than males. For example, zebra finch nestlings raised in  
569 experimentally enlarged broods have higher SMRs in adulthood, and this effect is stronger in  
570 females (Verhulst et al., 2006). In this species, individuals who experience catch-up growth are  
571 more likely to experience long-term effects on metabolic rates. For example, nestling zebra  
572 finches reared on a low protein diet during the early phase of the nestling period, but then  
573 transferred to a high protein diet for the latter part of the nestling period, exhibit catch-up growth  
574 and have higher SMRs in adulthood (Criscuolo et al., 2008). In this study, zebra finches reared  
575 on a low protein diet throughout the nestling period did not exhibit catch-up growth nor an  
576 increase in metabolic rates. This suggests that variation in growth patterns during development  
577 may contribute to variation in metabolic rates in adulthood. In our study of song sparrows, both  
578 food restriction and CORT treatment decreased growth in females, however in adulthood there  
579 was no difference in body size or mass between the three treatment groups. Therefore, it is

580 possible that the stress treatments had long-term effects on the SMRs of females because they  
581 altered normal growth patterns of females. In contrast to SMR, there was no effect of either  
582 experimental treatment on PMR or metabolic scope. Nest identity was significantly related to  
583 both PMR and SMR suggesting that genetic factors also influence variation in metabolic rates in  
584 song sparrows. In the current study, time constraints prohibited us from taking more than one  
585 measurement of SMR or PMR. However, zebra finches exposed to CORT during development  
586 exhibited higher variability in SMR (although only during the treatment period; Spencer and  
587 Verhulst, 2008). Therefore, it may be of interest in future studies to look at the effects of  
588 developmental stress on variability in SMRs or PMRs.

#### 589 **4.6 Conclusions**

590 In many species, variation in the early rearing environment can have profound effects on  
591 adult phenotype. In particular, exposure to stressors during development can permanently alter  
592 physiology and may predispose individuals to disease and negatively affect fitness (McMillen  
593 and Robinson, 2005; Monaghan, 2008). In the current study, both food restriction and CORT  
594 treatment had long-term effects on SMR in females, but not males, suggesting that the long-term  
595 effects of early-life stress on physiology and fitness may be sex-specific. This finding supports  
596 past research in zebra finches showing that females are more susceptible to early-life stressors  
597 than males (Verhulst et al., 2006; Martin, 2004). In addition, both food restriction and CORT  
598 treatment had sex-specific effects on nestling growth rates that exaggerated normal sex  
599 differences in nestling mass. This could give males a competitive advantage over their female  
600 siblings when being reared in a poor quality environment (e.g. Zanette et al. 2005). Future  
601 studies looking at the effects of developmental stress on other physiological systems (e.g.  
602 immune system, endocrine system) will help elucidate how males and females differentially  
603 allocate resources to growth and development when raised in a poor quality environment.

604

#### 605 **Acknowledgements**

606 We thank Alex Gerson and Brendan McCabe for technical assistance, Ainsley Furlonger, Janet  
607 Lapierre, and Shawn Kubli for help with fieldwork, Dr. Elizabeth Hampson for assistance with  
608 radioimmunoassays, and Dr. C. Guglielmo and two anonymous reviewers for comments on the  
609 manuscript. We are grateful to Dr. Alexandra Hernandez for advice on hand-rearing nestlings.

610 Finally, we thank The Queen's University Biological Station for allowing us to access the field  
611 site.

612

613 **Funding**

614 This research was supported by grants from The Natural Sciences and Engineering Research  
615 Council of Canada (NSERC) to S.A.M.-S. and E.A.M.-S. and a NSERC Canada Graduate  
616 Scholarship and a Queen Elizabeth II Graduate Scholarship in Science and Technology to K.L.S.

617

618 **References**

- 619 **Asensio, C., Muzzin, P. and Rohner-Jeanrenaud, F.** (2004). Role of glucocorticoids in the  
620 physiopathology of excessive fat deposition and insulin resistance. *Int. J. Obes. Relat. Metab.*  
621 *Disord.* **28 Suppl 4**, S45-52.
- 622 **Barker, D. J., Hales, C. N., Fall, C. H., Osmond, C., Phipps, K. and Clark, P. M.** (1993).  
623 Type 2 (non-insulin-dependent) diabetes mellitus, hypertension and hyperlipidaemia (syndrome  
624 X): Relation to reduced fetal growth. *Diabetologia* **36**, 62-67.
- 625 **Belthoff, J.R. and Dufty, A. M. Jr.** (1998). Corticosterone, body condition, and locomotor  
626 activity: a model for dispersal in screech-owls. *Anim. Behav.* **55**, 405-415.
- 627 **Breuner, C. W., Greenberg, A. L. and Wingfield, J. C.** (1998). Noninvasive corticosterone  
628 treatment rapidly increases activity in Gambel's white-crowned sparrows (*Zonotrichia*  
629 *leucophrys gambelii*) *Gen. Comp. Endocrinol.* **111**, 386-394.
- 630 **Buchanan, K. L., Evans, M. R., Goldsmith, A. R., Bryant, D. M. and Rowe, L. V.** (2001).  
631 Testosterone influences basal metabolic rate in male house sparrows: a new cost of dominance  
632 signaling? *Proc. R. Soc. Lond. Biol.* **268**, 1337-1344.
- 633 **Buchanan, K. L., Leitner, S., Spencer, K. A., Goldsmith, A. R. and Catchpole, C. K.** (2004).  
634 Developmental stress selectively affects the song control nucleus HVC in the zebra finch *Proc.*  
635 *R. Soc. Lond. Biol.* **271**, 2381-2386.
- 636 **Buchanan, K. L., Spencer, K. A., Goldsmith, A. R. and Catchpole, C. K.** (2003). Song as an  
637 honest signal of past developmental stress in the European starling (*Sturnus vulgaris*). *Proc. R.*  
638 *Soc. Lond. Biol.* **270**, 1149-1156.
- 639 **Buttemer, W. A., Warne, S., Bech, C. and Astheimer, L. B.** (2008). Testosterone effects on  
640 avian basal metabolic rate and aerobic performance: facts and artefacts. *Comp. Biochem. Physiol.*  
641 *A. Mol. Integr. Physiol.* **150**, 204-210.
- 642 **Chappell, M. A., Bech, C. and Buttemer, W. A.** (1999). The relationship of central and  
643 peripheral organ masses to aerobic performance variation in house sparrows. *J. Exp. Biol.* **202**,  
644 2269-2279.
- 645 **Chin, E. H., Love, O. P., Verspoor, J. J., Williams, T. D., Rowley, K. and Burness, G.**  
646 (2009). Juveniles exposed to embryonic corticosterone have enhanced flight performance. *Proc.*  
647 *R. Soc. Lond. Biol.* **276**, 499-505.



- 648 **Clinchy, M., Zanette, L., Boonstra, R., Wingfield, J. C. and Smith, J. N. M.** (2004).  
649 Balancing food and predator pressure induces chronic stress in songbirds. *Proc. R. Soc. Lond. B*  
650 **271**, 2473-2479.
- 651 **Crespi, E. J. and Denver, R. J.** (2005). Roles of stress hormones in food intake regulation in  
652 anuran amphibians throughout the life cycle. *Comp. Biochem. Physiol. A. Mol. Integr. Physiol.*  
653 **141**, 381-390.
- 654 **Criscuolo, F., Monaghan, P., Nasir, L. and Metcalfe, N. B.** (2008). Early nutrition and  
655 phenotypic development: 'catch-up' growth leads to elevated metabolic rate in adulthood. *Proc.*  
656 *R. Soc. Lond. Biol.* **275**, 1565-1570.
- 657 **Delany, A. M., Dong, Y. and Canalis, E.** (1994). Mechanisms of glucocorticoid action in bone  
658 cells. *J. Cell. Biochem.* **56**, 295-302.
- 659 **Denver, R. J., Mirhadi, N. and Phillips, M.** (1998). Adaptive plasticity in amphibian  
660 metamorphosis: Response of *Scaphiopus hammondi* tadpoles to habitat desiccation. *Ecology*  
661 **79**, 1859-1872.
- 662 **Desai, M., Crowther, N. J., Lucas, A. and Hales, C. N.** (1996). Organ-selective growth in the  
663 offspring of protein-restricted mothers. *Br. J. Nutr.* **76**, 591-603.
- 664 **Desai, M., Gayle, D., Babu, J. and Ross, M. G.** (2005). Programmed obesity in intrauterine  
665 growth-restricted newborns: modulation by newborn nutrition. *Am. J. Physiol. Regul. Integr.*  
666 *Comp. Physiol.* **288**, 91-96.
- 667 **Farrell, T. M., Weaver, K., An, Y. S. and MacDougall-Shackleton, S. A.** (2011). Song bout  
668 length is indicative of spatial learning in European starlings. *Behav Ecol.* In press
- 669 **Fernandez-Twinn, D. S. and Ozanne, S. E.** (2006). Mechanisms by which poor early growth  
670 programs type-2 diabetes, obesity and the metabolic syndrome. *Physiol. Behav.* **88**, 234-243.
- 671 **Gerson, A. R. and Guglielmo, C. G.** (2011). House sparrows (*Passer Domesticus*) increase  
672 protein catabolism in response to water restriction. *Am. J. Physiol. Regul. Integr. Comp. Physiol.*  
673 **300**, 925-930.
- 674 **Griffiths, R., Double, M. C., Orr, K. and Dawson, R. J.** (1998). A DNA test to sex most birds.  
675 *Mol. Ecol.* **7**, 1071-1075.
- 676 **Guglielmo, C. G., McGuire, L. P., Gerson, A. R. and Seewagen, C. L.** (2011). Simple, rapid,  
677 and non-invasive measurement of fat, lean, and total water masses of live birds using quantitative  
678 magnetic resonance. *J Ornithol* **152**, 75-85.

- 679 **Hales, C. N. and Ozanne, S. E.** (2003). The dangerous road of catch-up growth. *J. Physiol.* **547**,  
680 5-10.
- 681 **Harris, A. and Seckl, J.** (2011). Glucocorticoids, prenatal stress and the programming of  
682 disease. *Horm. Behav.* **59**, 279-289.
- 683 **Hennemann, W. W.** (1983). Relationship among body mass, metabolic rate and the intrinsic  
684 rate of natural increase in mammals. *Oecologia* **56**, 104-108.
- 685 **Hinds, D. S., Baudinette, R. V., MacMillen, R. E. and Halpern, E. A.** (1993). Maximum  
686 metabolism and the aerobic factorial scope of endotherms. *J. Exp. Biol.* **182**, 41-56.
- 687 **Jennings, B. J., Ozanne, S. E., Dorling, M. W. and Hales, C. N.** (1999). Early growth  
688 determines longevity in male rats and may be related to telomere shortening in the kidney. *FEBS*  
689 *Lett.* **448**, 4-8.
- 690 **Kempster, B., Zanette, L., Longstaffe, F. J., MacDougall-Shackleton, S. A., Wingfield, J. C.**  
691 **and Clinchy, M.** (2007). Do stable isotopes reflect nutritional stress? Results from a laboratory  
692 experiment on song sparrows. *Oecologia* **151**, 365-371.
- 693 **Kern, M., Bacon, W., Long D. and Cowie, R. J.** (2001). Possible roles for corticosterone and  
694 critical size in the fledging of nestling pied flycatchers. *Physiol. Biochem. Zool.* **75**, 651-659.
- 695 **Kitaysky, A. S., Kitaiskaia, E. V., Wingfield, J. C. and Piatt, J. F.** (2001a). Dietary restriction  
696 causes chronic elevation of corticosterone and enhances stress response in red-legged kittiwake  
697 chicks. *J. Comp. Physiol. B.* **171**, 701-709.
- 698 **Kitaysky, A. S., Wingfield, J. C. and Piatt, J. F.** (2001b). Corticosterone facilitates begging  
699 and affects resource allocation in the black-legged kittiwake. *Behav Ecol* **12**, 619-625.
- 700 **Lesage, J., Blondeau, B., Grino, M., Breant, B. and Dupouy, J. P.** (2001). Maternal  
701 undernutrition during late gestation induces fetal overexposure to glucocorticoids and  
702 intrauterine growth retardation, and disturbs the hypothalamo-pituitary adrenal axis in the  
703 newborn rat. *Endocrinology* **142**, 1692-1702.
- 704 **Lighton, J. R. B.** (2008). *Measuring Metabolic Rates: A Manual for Scientists*. Oxford  
705 University Press. New York, N.Y., USA, 2008.
- 706 **MacDonald, I. F., Kempster, B., Zanette, L. and MacDougall-Shackleton, S. A.** (2006).  
707 Early nutritional stress impairs development of a song-control brain region in both male and  
708 female juvenile song sparrows (*Melospiza melodia*) at the onset of song learning. *Proc. R. Soc.*  
709 *Lond. Biol.* **273**, 2559-2564.

- 710 **MacDougall-Shackleton, S. A., Dindia, L., Newman, A. E., Potvin, D. A., Stewart, K. A. and**  
711 **MacDougall-Shackleton, E. A.** (2009). Stress, song and survival in sparrows. *Biol. Lett.* **5**, 746-  
712 748.
- 713 **Manini, T. M.** (2010). Energy expenditure and aging. *Ageing Res. Rev.* **9**, 1-11.
- 714 **Martin, T. L. F.** (2004). Sex-specific growth rates in zebra finch nestlings: a possible  
715 mechanism for sex ratio adjustment. *Behav. Ecol.* **15**, 174-180.
- 716 **McMillen, I. C. and Robinson, J. S.** (2005). Developmental origins of the metabolic syndrome:  
717 prediction, plasticity, and programming. *Physiol. Rev.* **85**, 571-633.
- 718 **Metcalf, N. B. and Monaghan, P.** (2001). Compensation for a bad start: grow now, pay later?  
719 *Trends Ecol. Evol.* **16**, 254-260.
- 720 **Merila, J. and Sheldon, B.C.** (2001). Avian Quantitative Genetics. In *Current Ornithology vol*  
721 *16* (ed. V. Nolan Jr and C. F. Thompson) pp 179-198. New York: Plenum Press.
- 722 **Mitton, J.B. and Grant, M.C.** (1984). Associations among protein heterozygosity, growth rate,  
723 and developmental homeostasis. *Annu. Rev. Ecol. Syst.* **15**, 479-499.
- 724 **Monaghan, P.** (2008). Early growth conditions, phenotypic development and environmental  
725 change. *Phil. Trans. R. Soc. Lond. Biol.* **363**, 1635-1645.
- 726 **Newman, A. E., Pradhan, D. S. and Soma, K. K.** (2008). Dehydroepiandrosterone and  
727 corticosterone are regulated by season and acute stress in a wild songbird: jugular versus brachial  
728 plasma. *Endocrinology* **149**, 2537-2545.
- 729 **Nowicki, S., Searcy, W. A. and Peters S.** (2002). Brain development, song learning and mate  
730 choice in birds: a review and experimental test of the “nutritional stress hypothesis.” *J. Comp.*  
731 *Physiol. A* **188**, 1003-1014.
- 732 **O'Regan, D., Kenyon, C. J., Seckl, J. R. and Holmes, M. C.** (2004). Glucocorticoid exposure  
733 in late gestation in the rat permanently programs gender-specific differences in adult  
734 cardiovascular and metabolic physiology. *Am. J. Physiol. Endocrinol. Metab.* **287**, 863-870.
- 735 **Painter, R.C., Roseboom, T.J., Bleker, O.P.** (2005). Prenatal exposure to the Dutch famine and  
736 disease in later life: An overview. *Reprod. Toxicol.* **20**, 345-352.
- 737 **Pierce, B. J., McWilliams, S. R., O'Connor, T. P., Place, A. R. and Guglielmo, C. G.** (2005).  
738 Effect of dietary fatty acid composition on depot fat and exercise performance in a migrating  
739 songbird, the red-eyed vireo. *J. Exp. Biol.* **208**, 1277-1285.

- 740 **Potvin, D. A. and MacDougall-Shackleton, E. A.** (2010). Paternal song complexity predicts  
741 offspring sex ratios close to fledging, but not hatching, in song sparrows. *Wilson J. Ornithol.*  
742 **122**, 146-152.
- 743 **Potvin, D. A. and MacDougall-Shackleton, E. A.** (2009). Parental investment amplifies effects  
744 of genetic complementarity on growth rates in song sparrows, *Melospiza melodia*. *Anim Behav*  
745 **78**, 943-948.
- 746 **Price, E. R. and Guglielmo, C. G.** (2009). The effect of muscle phospholipid fatty acid  
747 composition on exercise performance: a direct test in the migratory white-throated sparrow  
748 (*Zonotrichia albicollis*). *Am. J. Physiol. Regul. Integr. Comp. Physiol.* **297**, 775-782.
- 749 **Price, K. and Ydenberg, R.** (1995). Begging and provisioning in broods of asynchronously-  
750 hatched yellow-headed blackbird nestlings. *Behav. Ecol. Sociobiol.* **37**, 201-208.
- 751 **Ravelli, A. C., van der Meulen, J. H., Michels, R. P., Osmond, C., Barker, D. J., Hales, C.**  
752 **N. and Bleker, O. P.** (1998). Glucose tolerance in adults after prenatal exposure to famine.  
753 *Lancet* **351**, 173-177.
- 754 **Ravelli, A. C., van Der Meulen, J. H., Osmond, C., Barker, D. J. and Bleker, O. P.** (1999).  
755 Obesity at the age of 50 y in men and women exposed to famine prenatally. *Am. J. Clin. Nutr.*  
756 **70**, 811-816.
- 757 **Rich, E.L. and Romero, L.M.** (2005). Exposure to chronic stress downregulates corticosterone  
758 responses to acute stressors. *Am. J. Physiol. Regul. Integr. Comp. Physiol.* **288**, 1628-1636.
- 759 **Rinaudo, P. and Wang, E.** (2011). Fetal programming and metabolic syndrome. *Annu. Rev.*  
760 *Physiol* **74**: 3.1-3.24, 2011.
- 761 **Romero, L. M., Storchlic, D. and Wingfield, J. C.** (2005). Corticosterone inhibits feather  
762 growth: potential mechanism explaining seasonal down regulation of corticosterone during molt.  
763 *Comp. Biochem. Physiol. A. Mol. Integr. Physiol.* **142**, 65-73.
- 764 **Root, T. L., O'Connor, T. P. and Dawson, D. R.** (1991). Standard metabolic level and  
765 insulative characteristics of eastern house finches, *Carpodacus mexicanus*. *Physiol. Zool.* **64**,  
766 1279-1295.
- 767 **Schmidt, K.L., Furlonger, A.A., Lapierre, J.M., MacDougall-Shackleton, E.A.,**  
768 **MacDougall-Shackleton, S.A.** (2012). Regulation of the HPA axis is related to song complexity  
769 and measures of Phenotypic Quality in song sparrows. *Horm Behav*, **61**, 652-659.
- 770

- 771 **Schmidt, K.L., Pradhan, D.S., Shah, A.H., Charlier, T.D., Chin, E.H. and Soma, K.K.**  
772 (2008). Neurosteroids, immunosteroids, and the Balkanization of endocrinology. *Gen. Comp.*  
773 *Endocrinol.* **157**, 266-274.
- 774 **Searcy, W. A., Peters, S. and Nowicki, S.** (2004). Effects of early nutrition on growth rate and  
775 adult size in song sparrows *Melospiza melodia*. *J. Avian Biol.* **35**, 269-279.
- 776 **Seckl, J. R.** (1994). Glucocorticoids and small babies. *Q. J. Med.* **87**, 259-262.
- 777 **Smith, J.N.M. and Dhondt, A. A.** (1980). Experimental confirmation of heritable  
778 morphological variation in a natural population of song sparrows. *Evolution* **34**, 1155-1158.
- 779 **Snoeck, A., Remacle, C., Reusens, B. and Hoet, J. J.** (1990). Effect of a low protein diet  
780 during pregnancy on the fetal rat endocrine pancreas. *Biol. Neonate* **57**, 107-118.
- 781 **Speakman, J. R.** (2005). Body size, energy metabolism and lifespan. *J. Exp. Biol.* **208**, 1717-  
782 1730.
- 783 **Spencer, K. A., Buchanan, K. L., Goldsmith, A. R. and Catchpole, C. K.** (2003). Song as an  
784 honest signal of developmental stress in the zebra finch (*Taeniopygia guttata*). *Horm. Behav.* **44**,  
785 132-139.
- 786 **Spencer, K. A., Buchanan, K. L., Goldsmith, A. R. and Catchpole, C. K.** (2004).  
787 Developmental stress, social rank and song complexity in the European starling (*Sturnus*  
788 *vulgaris*). *Proc. R. Soc. Lond. Biol.* **271 Suppl 3**, S121-S123.
- 789 **Spencer, K. A., Evans, N. P. and Monaghan, P.** (2009). Postnatal stress in birds: a novel model  
790 of glucocorticoid programming of the hypothalamic-pituitary-adrenal axis. *Endocrinology* **150**,  
791 1931-1934.
- 792 **Spencer, K. A. and Verhulst, S.** (2007). Delayed behavioral effects of postnatal exposure to  
793 corticosterone in the zebra finch (*Taeniopygia guttata*). *Horm. Behav.* **51**, 273-280.
- 794 **Spencer, K. A. and Verhulst, S.** (2008). Post-natal exposure to corticosterone affects standard  
795 metabolic rate in the zebra finch (*Taeniopygia guttata*). *Gen. Comp. Endocrinol.* **159**, 250-256.
- 796 **Verhulst, S., Holveck, M. J. and Riebel, K.** (2006) Long-term effects of manipulated natal  
797 brood size on metabolic rate in zebra finches. *Biol. Lett.* **2**, 478-480.
- 798 **Welberg, L. A. and Seckl, J. R.** (2001). Prenatal stress, glucocorticoids and the programming of  
799 the brain. *J. Neuroendocrinol.* **13**, 113-128.
- 800 **West, B. T.** (2009). Analyzing longitudinal data with the linear mixed models procedure in  
801 SPSS. *Eval Health Prof* **32**, 207-228.

802 **Zambrano, E., Bautista, C. J., Deas, M., Martinez-Samayoa, P. M., Gonzalez-Zamorano,**  
803 **M., Ledesma, H., Morales, J., Larrea, F. and Nathanielsz, P. W.** (2006). A low maternal  
804 protein diet during pregnancy and lactation has sex- and window of exposure-specific effects on  
805 offspring growth and food intake, glucose metabolism and serum leptin in the rat. *J. Physiol.*  
806 **571**, 221-230.

807 **Zanette, L., Macdougall-Shackleton, E. A., Clinchy, M. and Smith, J. N. M.** (2005). Brown-  
808 headed cowbirds skew host offspring sex ratios. *Ecology* **86**, 815-820.

809

810

## 811 **Figure Legends**

812 Figure 1. Experimental timeline used to determine the effects of early-life food restriction or  
813 corticosterone treatment on nestling growth and adult body size, body composition, and  
814 metabolic rates in song sparrows.

815  
816 Figure 2. The effect of food restriction (Food Res) or corticosterone (CORT) treatment on  
817 nestling growth rates in male (A) and female (B) song sparrows. Insets show mass of nestlings  
818 during the hand-rearing period (days 9 to 18) when treatments were most intense. The total  
819 treatment period (hand-rearing and post-fledging treatment) lasted from 7 days of age to 60 days  
820 of age. \* $p < 0.05$

821  
822 Figure 3. The effect of food restriction or corticosterone (CORT) treatment on structural body  
823 size of song sparrows at 25 days of age (A), 45 days of age (B) and in adulthood (C). Body size  
824 scores are the results from principal component analyses (PCA) that included measures of body  
825 mass, tarsus, and wing length. Results from the PCA can be found in Table 1. Treatments lasted  
826 from 7 days of age to 60 days of age. \* $p < 0.05$ , \*\* $p < 0.01$ .

827  
828 Figure 4. Simple linear regressions showing the relationship between body mass (A) and lean  
829 mass (B) of the experimental birds in adulthood and their father's body mass. The father was the  
830 resident male bird on the territory where a nest was located and was caught prior to hatching.

831  
832 Figure 5. The effect of food restriction or corticosterone (CORT) treatment on body composition  
833 of song sparrows including total body mass (A), lean mass (B), and fat mass (C). Treatments  
834 lasted from 7 days of age to 60 days of age. Body composition analysis was conducted using  
835 quantitative magnetic resonance analysis when birds were ~7 months of age. \* $p < 0.05$

836  
837 Figure 6. The effect of food restriction or corticosterone (CORT) treatment on standard  
838 metabolic rates (A), peak metabolic rates (B) and metabolic scope (C) of song sparrows.  
839 Treatments lasted from 7 days of age to 60 days of age. Metabolic rates were assessed when  
840 birds were ~7 months of age. \* $p < 0.05$ , \*\* $p < 0.01$

841



**Table 1. The Age and Mass of Nestlings at the Start of the Experiment**

|                            | <b>Control</b> |               | <b>Food Restriction</b> |               | <b>CORT</b> |               |
|----------------------------|----------------|---------------|-------------------------|---------------|-------------|---------------|
|                            | <i>Male</i>    | <i>Female</i> | <i>Male</i>             | <i>Female</i> | <i>Male</i> | <i>Female</i> |
| <b>Sample Size</b>         | 9              | 7             | 8                       | 8             | 6           | 9             |
| <b>Age at Capture (d)</b>  | 3.56±0.44      | 3.71±0.57     | 3.25±0.16               | 3.63±0.50     | 3.17±0.17   | 3.44±0.44     |
| <b>Mass at Capture (g)</b> | 8.98±1.18      | 9.45±1.13     | 9.60±0.69               | 9.18±1.36     | 10.03±0.55  | 8.88±1.12     |

Note: Age at capture and mass at capture represent the age and mass of nestlings the day they were brought into captivity. Values represent means ± SEM. CORT = corticosterone

**Table 2. Principal Component Analysis for Morphological Measurements**

|                   | Eigenvalue | % Variance Explained | Factor Loadings |               |             |
|-------------------|------------|----------------------|-----------------|---------------|-------------|
|                   |            |                      | <i>Mass</i>     | <i>Tarsus</i> | <i>Wing</i> |
| <b>day 25 PC1</b> | 1.71       | 56.86                | 0.83            | 0.74          | 0.69        |
| <b>day 45 PC1</b> | 1.71       | 56.89                | 0.77            | 0.74          | 0.75        |
| <b>Adult PC1</b>  | 1.83       | 61.02                | 0.75            | 0.87          | 0.72        |

Note: At each age, principal component analyses revealed one principle component (PC) with an eigenvalue greater than one.

**Figure 1**

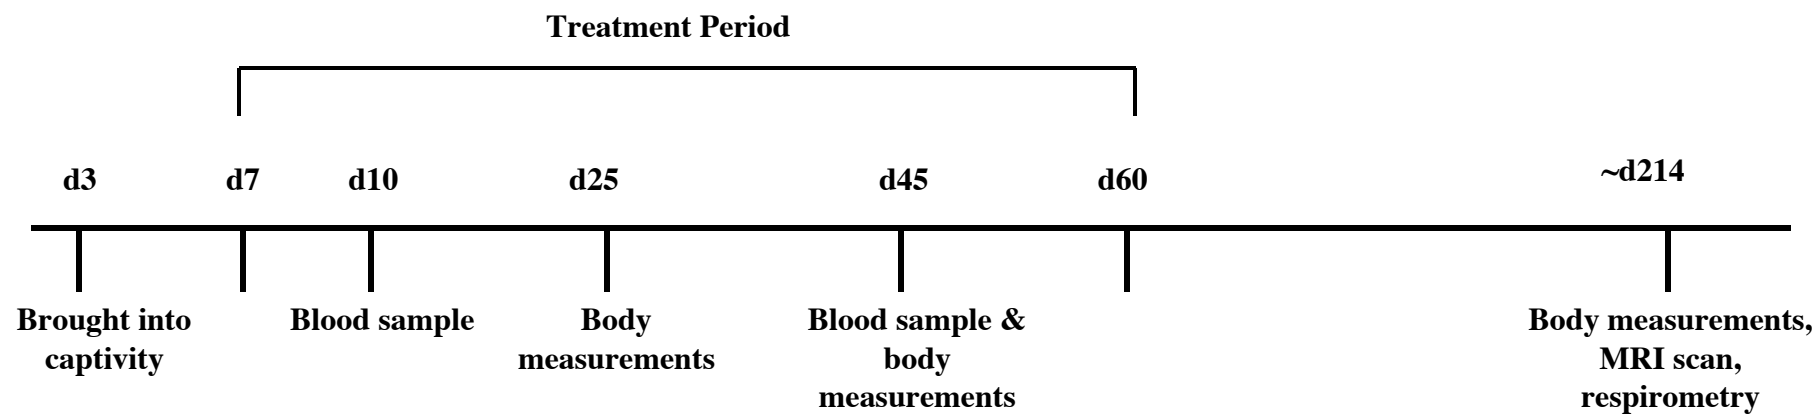

Figure 2

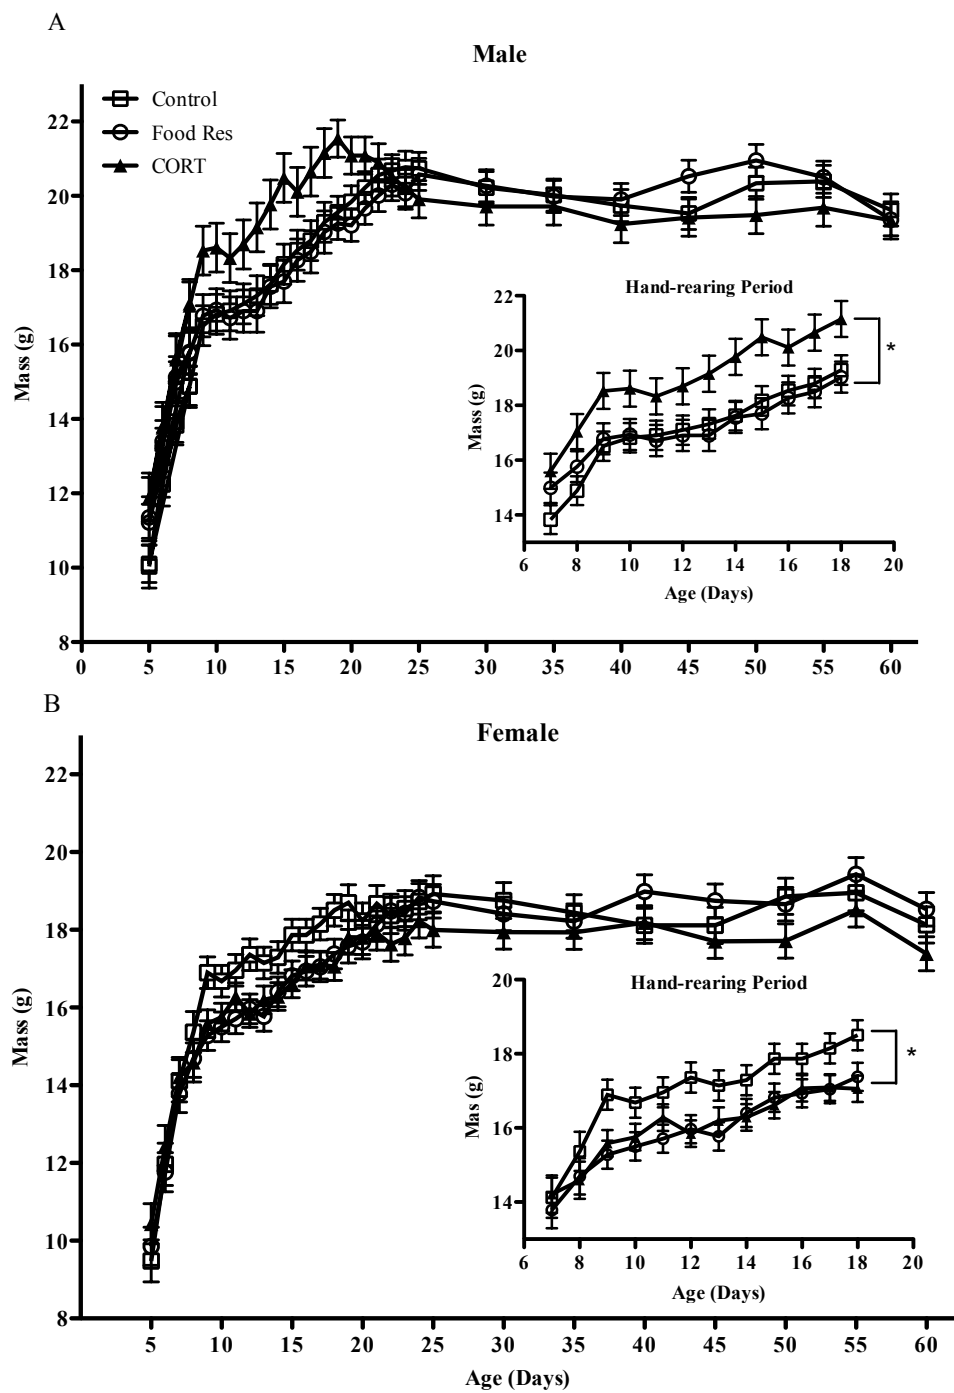

Figure 3

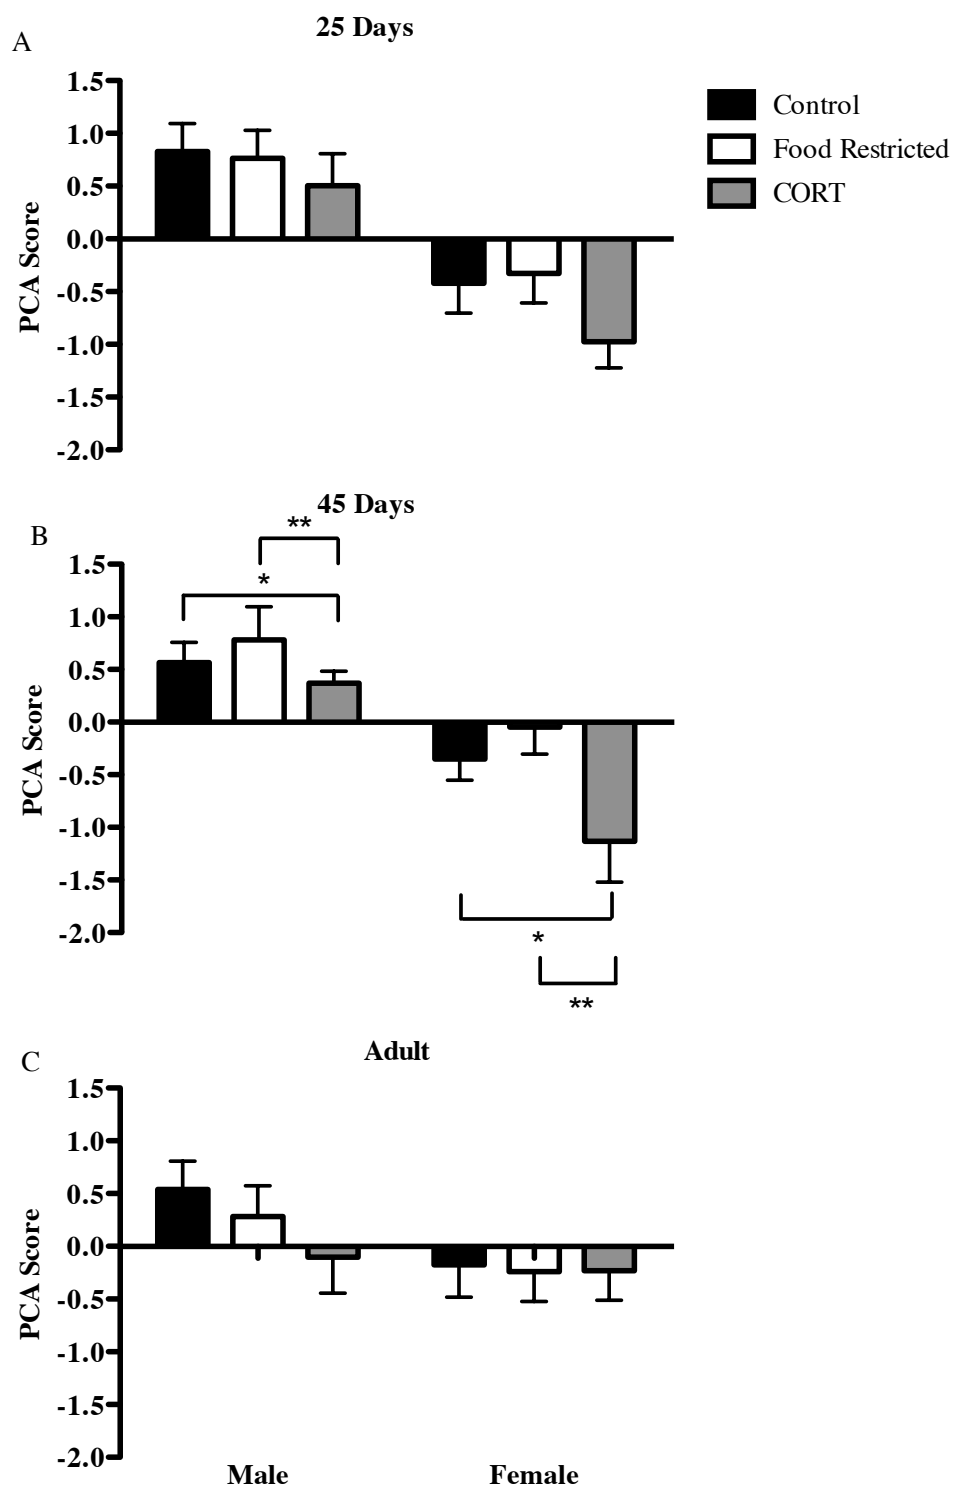

Figure 4

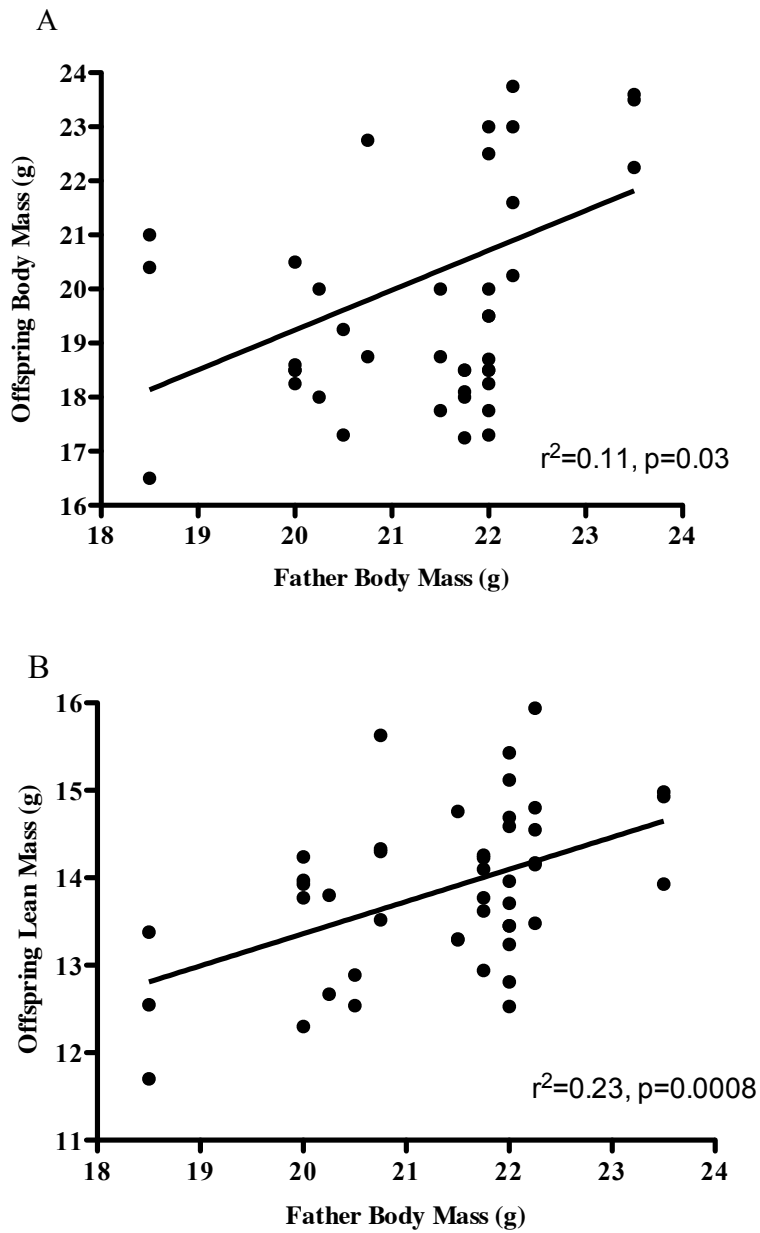

Figure 5

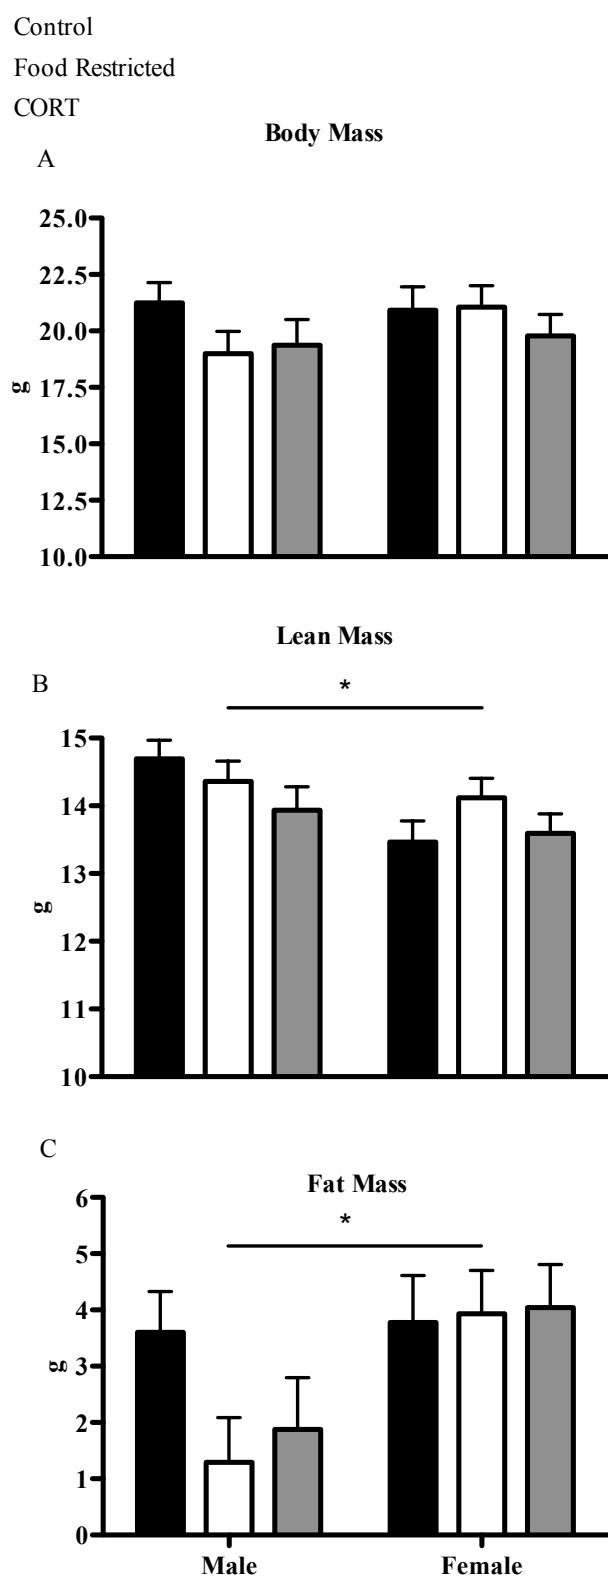



Figure 6

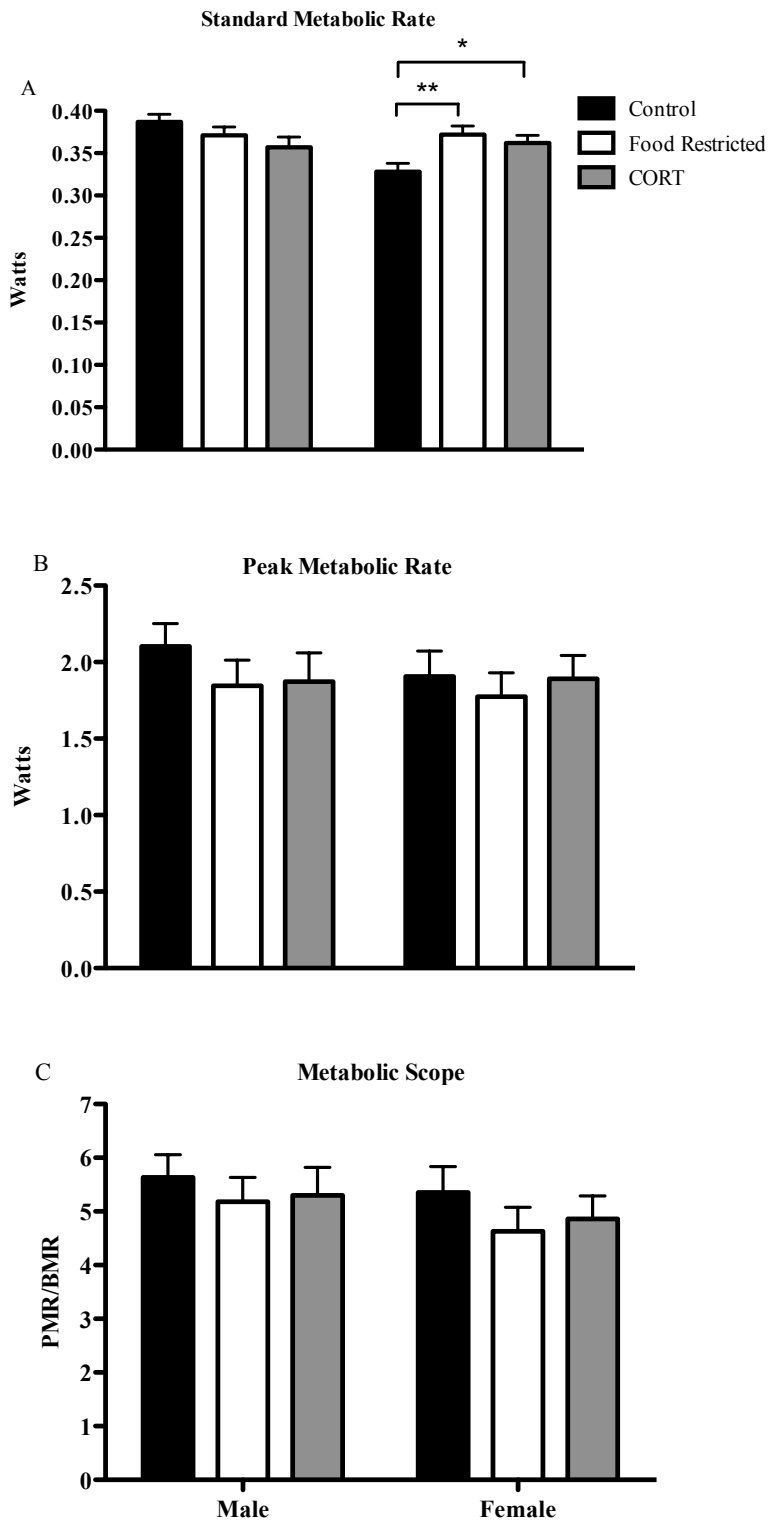



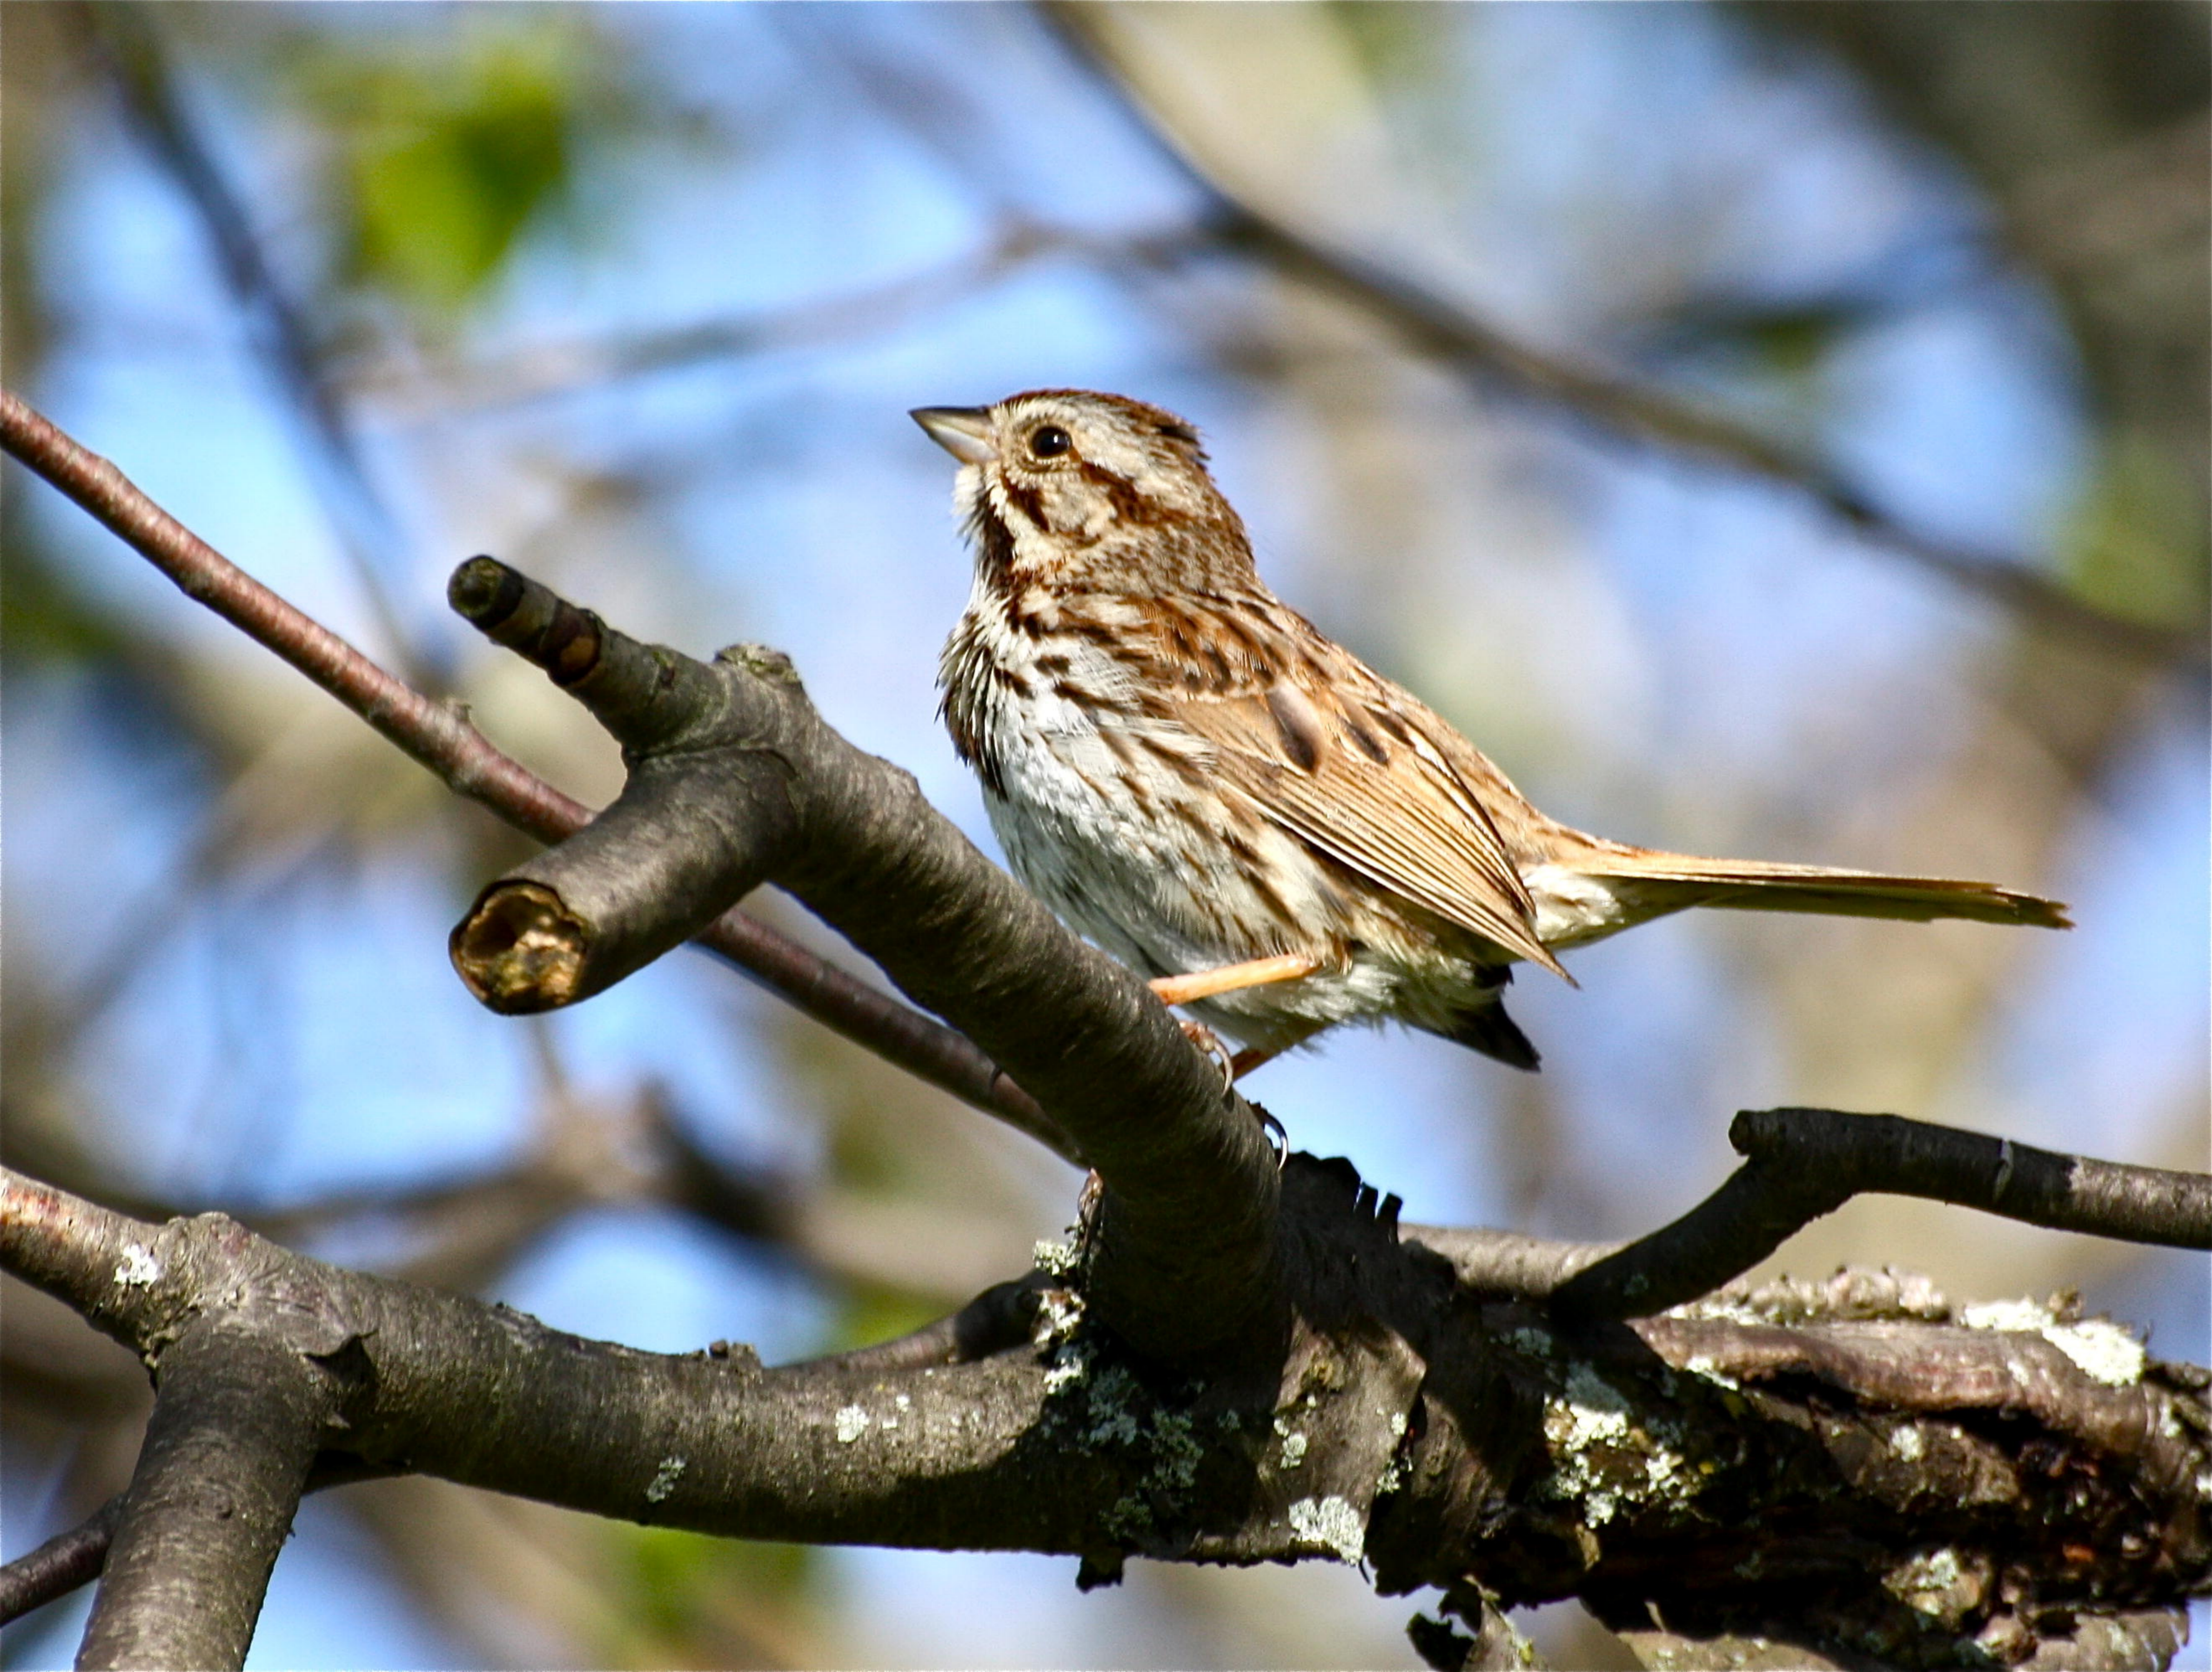

Source: https://cob.silverchair.com/jeb/article-pdf/doi/10.1242/jeb.068965/2005457/jeb_068965.pdf
